# Spatial sampling in human visual cortex is modulated by both spatial and feature-based attention

D.M. van Es<sup>1</sup>      J. Theeuwes<sup>1</sup>      T. Knapen<sup>1,2</sup>

## *Affiliation*

<sup>1</sup>Behavioral and Movement Sciences, Vrije Universiteit Amsterdam, 1081 BT Amsterdam, the Netherlands

<sup>2</sup>Spinoza Centre for Neuroimaging, Royal Academy of Sciences, 1105 BK, Amsterdam, the Netherlands

## *Corresponding Authors:*

D.M. van Es (daan.van.es@gmail.com); T. Knapen (tknapen@gmail.com)

## *Conflict of interest*

The authors declare no competing financial interests.

## *Acknowledgements:*

This study was supported in part by an Open Research Area grant (ORA; #464-11-030) issued by the Netherlands Organisation for Scientific Research (NWO) to JT.

## Abstract

Spatial attention changes the sampling of visual space. Behavioral studies suggest that feature-based attention modulates this resampling to optimize the attended feature's sampling. We investigate this hypothesis by estimating spatial sampling in visual cortex while independently varying both feature-based and spatial attention.

Our results show that spatial and feature-based attention interacted: resampling of visual space depended on both the attended location and feature (color vs. temporal frequency). This interaction occurred similarly throughout visual cortex, regardless of an area's overall feature preference. However, the interaction did depend on spatial sampling properties of voxels that prefer the attended feature. These findings are parsimoniously explained by variations in the precision of an attentional gain field.

Our results demonstrate that the deployment of spatial attention is tailored to the spatial sampling properties of units that are sensitive to the attended feature.

## Introduction

The resolution of the visual system is highest at the fovea and decreases gradually with increasing eccentricity. But the visual system's resolution is not fixed. Attention can be directed to a location in space and/or a visual feature, which temporarily improves perceptual sensitivity (Posner et al., 1980; Rossi and Paradiso, 1995; Found and Müller, 1996; Carrasco and Yeshurun, 1998; Yeshurun and Carrasco, 1999; Kumada, 2001; Saenz et al., 2003; Wolfe et al., 2003; Theeuwes and van der Burg, 2007) at the cost of reduced sensitivity for non-attended locations and features (Kastner and Pinsk, 2004; Pestilli and Carrasco, 2005; Wegener et al., 2008).

Attending a location in space increases activity in units representing the attended location, as shown by both electrophysiological (Luck et al., 1997; Reynolds et al., 2000) and fMRI studies (Tootell et al., 1998; Silver et al., 2005; Datta and DeYoe, 2009). In addition, spatial receptive fields were shown to shift toward an attended location in macaque MT+ (Womelsdorf et al., 2006) and V4 (Connor et al., 1997). Using fMRI to measure population receptive fields (pRFs; Dumoulin and Wandell, 2008; Dumoulin and Knapen, 2018), it was found that pRF shifts induced by spatial attention occur throughout human visual cortex (Klein et al., 2014; Kay et al., 2015; Sheremata and Silver, 2015; Vo et al., 2017), a process thought to improve visual resolution at the attended location (Anton-Erxleben and Carrasco, 2013; Kay et al., 2015; Vo et al., 2017). Such *spatial resampling* is understood as the result of an interaction between bottom-up sensory signals and a top-down attentional gain field (Womelsdorf et al., 2008; Klein et al., 2014; Miconi and VanRullen, 2016).

Feature-based attention, for example directed toward color or motion, selectively increases activity in those units that represent the attended feature, as evidenced by electrophysiological (Treue and Maunsell, 1996; Treue and Trujillo, 1999; McAdams and Maunsell, 2000; Maunsell and Treue, 2006; Müller et al., 2006; Zhang and Luck, 2009; Zhou and Desimone, 2011), fMRI (Saenz et al., 2002; Serences and Boynton, 2007; Jehee et al., 2011), and behavioral reports (Saenz et al., 2003; White and Carrasco, 2011). These studies consistently show that feature-based attention modulates processing irrespective of the attended stimulus's spatial location. In addition, feature-based attention also appears

to shift featural tuning curves toward the attended value, as reported by both electrophysiological (Motter, 1994; David et al., 2008) and fMRI studies (Çukur et al., 2013).

The similarity in the effects of feature-based and spatial attention on affected neural units suggests a common neural mechanism for both sources of attention (Hayden and Gallant, 2005; Cohen and Maunsell, 2011). Yet spatial attention necessitates retinotopically precise feedback (Miconi and VanRullen, 2016), while feature-based attention operates throughout the visual field (Maunsell and Treue, 2006). Studies investigating whether one source of attention potentiates the other generally find that interactions are either nonexistent or very weak at the earliest stages of processing (David et al., 2008; Hayden and Gallant, 2009; Patzwahl and Treue, 2009; Zhang and Luck, 2009), but emerge at later stages of visual processing (Hillyard and Munte, 1984; Handy et al., 2001; Bengson et al., 2012; Ibos and Freedman, 2016), and ultimately influence behavior (Kingstone, 1992; Kravitz and Behrmann, 2011; Leonard et al., 2015; White et al., 2015; Nordfang et al., 2017). In addition, the effects of feature-based compared to spatial attention arise earlier in time (Hopf et al., 2004; Hayden and Gallant, 2005; Andersen et al., 2011). This supports the idea that feature-based attention can direct spatial attention toward or away from specific locations containing attended or unattended features (Cohen and Shoup, 1997; Cepeda et al., 1998; Burnett et al., 2016). Especially when attention is endogenously cued, feature-based attention has been argued to influence the spatial resampling induced by spatial attention in order to optimize sampling of visual features for behavior (Yeshurun and Carrasco, 1998, 2000; Yeshurun et al., 2008; Barbot and Carrasco, 2017). Together, these studies suggest that feature-based attention can influence the spatial resampling resulting from spatial attention.

To investigate this hypothesis directly, we measured pRFs under conditions of differential spatial attention (i.e. toward fixation or the mapping stimulus) and feature-based attention (i.e. toward the mapping stimulus's motion or color content). We first characterize how spatial attention influences the sampling of visual space, and subsequently investigate how feature-based attention modulates this spatial resampling. An explicit gain-field interaction model allowed us to formally capture the pRF position changes resulting from our attentional manipulations (Klein et al., 2014).

In brief, our results show that pRF changes are stronger when attending the stimulus's

91 color compared to temporal frequency content. These modulations occurred similarly  
 92 throughout the visual system, regardless of an area's bottom-up feature preference (such  
 93 as areas MT+ for temporal frequency and areas VO and hV4 for color (Liu and Wandell,  
 94 2005; Brouwer and Heeger, 2009, 2013)). We suggest that the larger degree of spatial  
 95 resampling when attending color is related to finer spatial sampling in relatively color  
 96 preferring voxels. In addition, we show that these feature-based attentional modulations  
 97 can be explained by changes in the precision of the attentional gain field.

## 98 *Results*

99 We first characterize the pattern of pRF parameter changes that resulted from the differen-  
 100 tial allocation of spatial attention (i.e. either toward fixation or the moving bar stimulus).  
 101 We explain this pattern of results from an attentional gain field perspective. Then, we  
 102 investigate how feature-based attention (i.e. either toward color or temporal frequency  
 103 changes in the bar) modulated the pRF changes, and how this modulation relates to  
 104 bottom-up feature preference.

### 105 *Region of interest definition*

106 Figure 1A shows voxels' *Attend Fixation* location preferences, by depicting color-coded  
 107 polar angle coordinates on an inflated cortical surface for one example participant's right  
 108 hemisphere. We examined the relation between pRF eccentricity and size within each  
 109 of the retinotopic regions, and performed further analyses on those regions that showed  
 110 clear progressions of polar angle on the surface as well as positive size-eccentricity rela-  
 111 tions in all participants, as shown in Figure 1B (and Supplementary Figure 1). In addition,  
 112 we created a *combined* ROI that pooled voxels across selected ROIs in order to evaluate  
 113 pRF changes across the visual system.

### 114 *pRF changes induced by spatial attention*

115 In order to quantify pRF changes resulting from differential allocation of spatial atten-  
 116 tion we created an *Attend Stimulus* condition by averaging pRF parameters between the

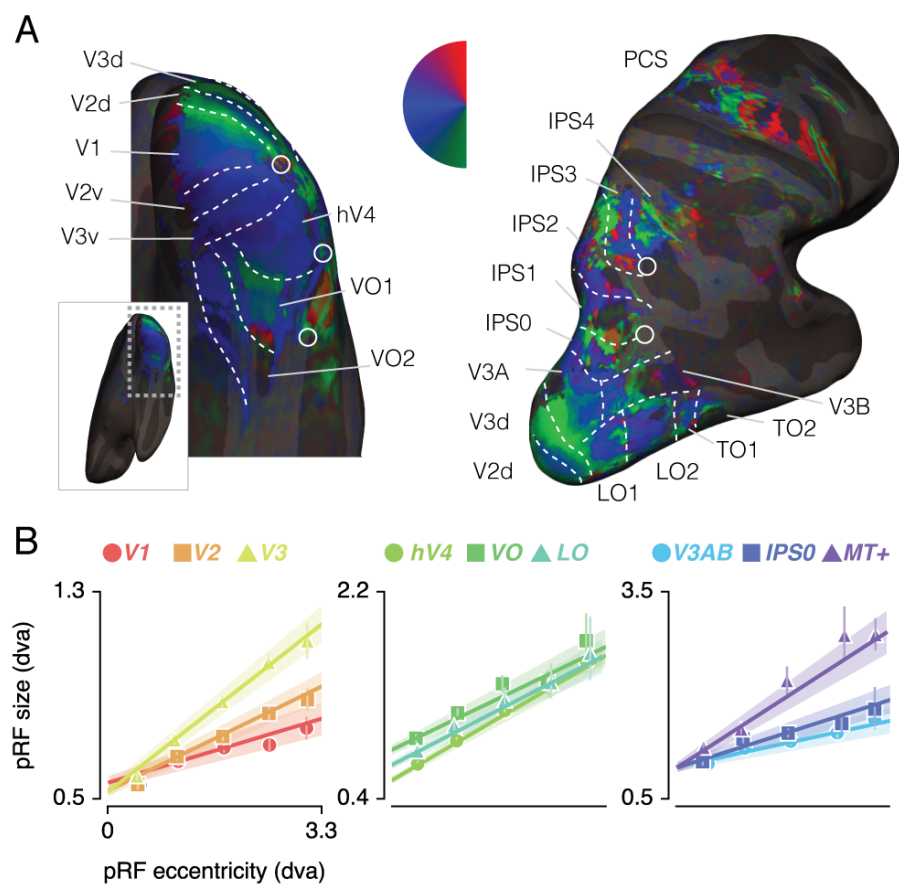

Figure 1: ROI definition A. *Attend Fixation* pRF polar angle maps for an example participant with retinotopic areas up to the intra-parietal sulcus defined by hand. B. *Attend Fixation* pRF size as a function of eccentricity for all areas that showed robust relationships across all participants. All error bars and shaded error regions denote 95% CI of data and linear fits respectively across voxels.

117 *Attend Color* and *Attend Temporal Frequency* (henceforth: *Attend TF*) conditions. To in-  
 118 spect how spatial attention affected pRF positions, we plotted a vector from the *Attend*  
 119 *Fixation* to the *Attend Stimulus* pRF position (Figure 2A and B and Supplementary Figure  
 120 2). Visual inspection of these pRF position shifts shows both increasing shift magnitude  
 121 up the visual hierarchy and shifts occurring mainly along the radial dimension (i.e. toward  
 122 or away from the fovea).

### 123 *pRF shift direction*

124 This latter observation seems at apparent odds with a recent study reporting pRFs to  
 125 mainly shift in the horizontal direction (Sheremata and Silver, 2015). To quantify the ob-  
 126 served direction of pRF shifts we computed the ratio of shifts in the radial, horizontal, and  
 127 vertical directions (see Figure 2C and Supplementary Figure 3). In line with the data of  
 128 Sheremata and Silver (2015), we find that changes of pRF horizontal location consistently  
 129 better describe the overall shifts than do changes of pRF vertical location in all ROIs ex-  
 130 cept V1/2/3 ( $p$ 's < .05, see Supplementary Tables 1 and 10). We also find that pRF shifts  
 131 are described even better by shifts in the radial dimension (i.e. changes in eccentricity)  
 132 compared to shifts in the horizontal direction in all ROIs ( $p$ 's < .01, see Supplementary Ta-  
 133 bles 1 and 11). Figure 2D is intended to ease interpretation of these results. It depicts how  
 134 different hypotheses regarding the underlying directionality of pRF shifts (i.e. horizontal,  
 135 vertical, or radial - i.e. foveopetal/foveofugal) translate into changes in measured pRF  $x$ ,  
 136  $y$ , and eccentricity as a function of quarter visual field polar angle (i.e. from vertical to  
 137 horizontal meridian). For example, if pRFs shift primarily in the radial direction (right  
 138 hypothesis column, Figure 2D), this would result in strongest pRF  $x$ -direction changes  
 139 close to the horizontal meridian and strongest pRF  $y$ -direction changes close to the ver-  
 140 tical meridian. pRF eccentricity changes however, would show no dependence on polar  
 141 angle. Figure 2D, right column, shows that the data (*combined* ROI) corresponds most  
 142 to the radial shift hypothesis. To quantify this visual intuition, we compared the slopes  
 143 of the change in pRF  $x$  and  $y$  over polar angle by binning polar angle into three bins and  
 144 comparing the first and last bins (i.e. horizontal and vertical meridian respectively). This  
 145 showed that, compared to the slope of pRF  $y$  change over polar angle, the slope of pRF  
 146  $x$  change was more negative ( $p$  < .001, cohen's  $d$  = 0.677,  $N$  = 11946, see Supplementary

Figure 4). This pattern of results can only be explained by pRFs shifting in the radial direction. Visual field coverage is known to be non-uniform such that the horizontal meridian is overrepresented at both subcortical (Schneider et al., 2004) and cortical (Swisher et al., 2007; Silva et al., 2017) levels and was also clearly present in our data (Rayleigh tests for non-uniformity in ROIs separately,  $p$ 's < .001, see Supplementary Tables 2, 12 and 13). This means that shifts that occur exclusively in the radial dimension appear as a dominance of horizontal compared to vertical shifts when averaging over the visual field.

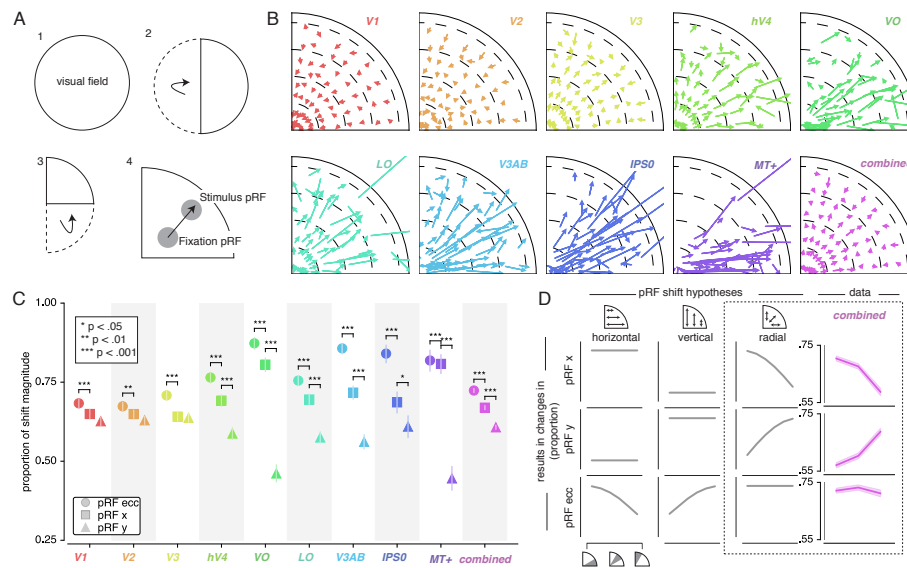

Figure 2: Effect of attention on pRF position. A. Plotting strategy. For pRF shift visualizations, all pRF positions are mirrored into one quadrant of the visual field. Then, vectors representing the shift of pRF centers between conditions were drawn from the *Attend Fixation* to the *Attend Stimulus* pRF position. B. Shift vectors as described in A. pRF shift magnitude increased up the visual hierarchy, and shifts appear to occur mainly in the radial direction (i.e. changes in pRF eccentricity). Dotted lines demarcate eccentricity bins used in subsequent analyses. C. Changes in pRF position in the horizontal, vertical, and radial directions as a proportion of the length of the shift vectors, as depicted in B. The magnitude of pRF shifts is consistently best described by changes in pRF eccentricity. D. pRF x, y and eccentricity position shifts plotted as a function of polar angle, for different shift direction hypotheses. The data closely matches the radial shift direction hypothesis, showing strongest pRF x shifts close to the horizontal meridian, strongest pRF y shifts close to the vertical meridian and strong pRF eccentricity changes across all polar angles. In C single, double, and triple asterisks indicate significant differences with FDR corrected  $p$  < .05, < .01 and < .001 respectively.



#### 154 *pRF changes across eccentricity*

155 To further inspect the attention-induced radial shifts described above, we plotted the  
156 difference between *Attend Stimulus* and *Attend Fixation* pRF eccentricity for each of four  
157 *Attend Fixation* pRF eccentricity bins (Figure 3A and Supplementary Figure 5). The *com-*  
158 *bined* ROI shows that overall, parafoveal pRFs shifted away from the fovea, while periph-  
159 eral pRFs shifted toward the fovea. These outward shifting parafoveal pRFs are found in  
160 all other ROIs except V1 and V2, whereas the inward shifting peripheral pRFs are also  
161 present in V1, V2 and V3 (see Supplementary Tables 3, 4, and 14-17).

162 In addition to pRF position changes, we also inspected changes in pRF size induced by  
163 differences in spatial attention as a function of *Attend Fixation* pRF eccentricity (Figure  
164 3B and Supplementary Figure 6). Overall, parafoveal pRFs increased in size, while periph-  
165 eral pRFs decreased in size. These expanding parafoveal pRFs were present in all ROIs  
166 except V2/3, whereas shrinking peripheral pRFs were found in all ROIs except V1, MT+  
167 and IPS0 (see Supplementary Tables 5, 6, and 18-21). Overall, this pattern of results is  
168 strikingly similar to the changes in pRF eccentricity described above. In fact, the changes  
169 in pRF size and eccentricity were strongly correlated in all ROIs (Figure 3C; Supplemen-  
170 tary Figure 6; Pearson R over 20 5-percentile bins between .74 and .99,  $p$ 's < .001, see  
171 Supplementary Tables 7 and 22). Together, these results show that attention to the stim-  
172 ulus caused parafoveal pRFs to shift away from the fovea and increase in size, whereas  
173 peripheral pRFs shifted toward the fovea and decreased in size.

#### 174 *Formal account for observed pattern of pRF shifts*

175 In order to provide a mechanistic explanation for the complex pattern of pRF shifts  
176 described above, we modeled our results using a multiplicative Gaussian gain field model  
177 (Womelsdorf et al., 2008; Klein et al., 2014). We adapted this framework to work in condi-  
178 tions where attention shifted over space as a function of time (see Methods). In brief, this  
179 modeling procedure used the *Attend Fixation* pRF, one attentional gain field at fixation  
180 and another convolved with the stimulus in order to predict the *Attend Stimulus* pRF posi-  
181 tion. We determined optimal attentional gain field sizes by minimizing the difference be-  
182 tween observed and predicted *Attend Stimulus* pRF positions in the quadrant visual field  
183 format of Figure 2B. Figure 4A (and Supplementary Figure 7) illustrates that model pre-

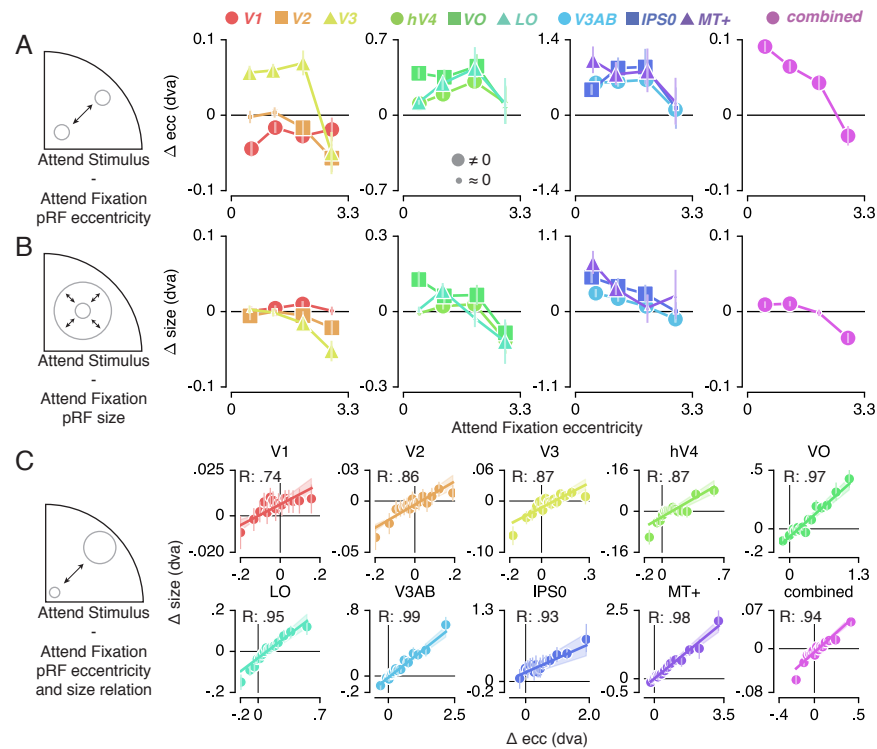

Figure 3: Effect of attention on pRF eccentricity and size. Difference between *Attend Stimulus* and *Attend Fixation* pRF eccentricity (A) and size (B) as a function of *Attend Fixation* eccentricity. Overall, parafoveal pRFs tend to shift away from the fovea and increase in size, while peripheral pRFs tend to shift toward the fovea and decrease in size. C. Changes in pRF eccentricity and size were strongly correlated in all ROIs. In A and B, markers are increased in size when bootstrapped distributions differ from 0 with FDR corrected  $p < .05$ . In C markers' errorbar denotes 95% CI of data over voxels and shaded error regions denote 95% CI of linear fit parameters over bins.

184 ditions closely followed the data, thereby accurately reproducing radially shifting pRFs.  
 185 Examining the predicted change in pRF eccentricity as a function of eccentricity (i.e. the  
 186 dominant pRF shift direction; Figure 4B and Supplementary Figure 8) showed that the  
 187 model was able to capture widely varying eccentricity change profiles across ROIs using  
 188 very similar attentional gain field sizes (Figure 4C). This shows that a common attentional  
 189 influence can result in very different pRF shift patterns, which then necessarily depend  
 190 on differential spatial sampling properties across ROIs (i.e. distribution of pRF sizes and  
 191 positions). In sum, these results show that the attentional gain field model provides a  
 192 parsimonious and powerful account for the variety of pRF shift patterns across ROIs.

193 We further investigated how the model was able to reproduce the eccentricity-  
 194 dependent eccentricity changes we reported above. For this, we inspected pRF shifts  
 195 induced by attending either fixation or the stimulus relative to the stimulus drive (i.e. the  
 196 pRF outside the influence of attention derived from the model). For illustrative purposes,  
 197 we here display results for V2, V3 and IPS0 as these areas showed marked differences in  
 198 their eccentricity change profile (Figure 4D-F). The left panels of each figure reveal the  
 199 effects of attending fixation and the stimulus separately. This shows that both sources of  
 200 spatial attention pull the measured pRFs toward the fovea, albeit with differing relative  
 201 magnitudes across eccentricity. The right panel of each figure shows that the resulting  
 202 difference between attending fixation and the stimulus constitutes the eccentricity  
 203 dependent patterns observed in the data (Figure 4B).

204 Together, these analyses show that existing multiplicative gain field models of atten-  
 205 tion can be extended to predict pRF shifts in situations where spatial attention shifts over  
 206 time. Additionally it confirms, extends, and quantifies earlier reports showing that the  
 207 precision of the attentional gain field is similar across the visual hierarchy (Klein et al.,  
 208 2014).

#### 209 *Feature-based attentional modulation*

210 Having established (1) the pattern of changes in spatial sampling (i.e. changes in pRF size  
 211 and eccentricity) resulting from differential allocation of spatial attention and (2) a mech-  
 212 anistic explanation of these changes, we next examined how this pattern was modulated

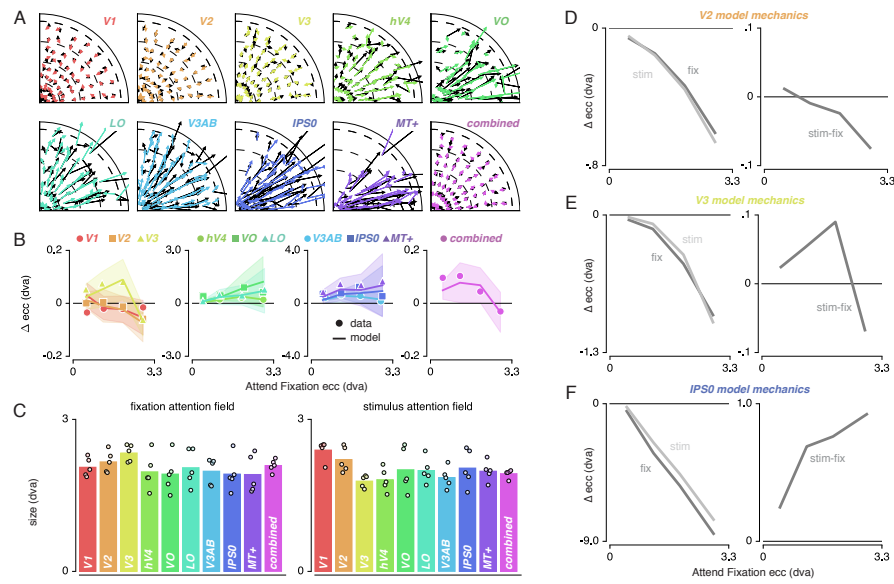

Figure 4: An attentional gain field model showed that the changes in pRF position can be described by a Gaussian interaction process. A. Observed (black) and predicted (color) pRF shifts. B. Observed and predicted changes in pRF eccentricity (the main pRF shift direction) as a function of eccentricity. Markers depict data and lines the corresponding attentional gain field model fit. C. Fitted fixation and stimulus attentional gain field sizes. Dots depict individual subjects, and the bar the average across subjects. D-F. Left panels depict changes in eccentricity induced by attending fixation (dark gray lines) and by attending the stimulus (light gray lines). Although both sources of attention cause a pull toward the fovea in all ROIs, relative shift magnitude differs across eccentricity. The right panels show how the difference between both spatial attention conditions results in the patterns as observed in B. In B, Error bars denote 95% CIs over subjects. Plotting conventions as in Figure 2.

by differences in feature-based attention. Figure 5A (and Supplementary Figure 9) shows how pRF eccentricity and size are differentially affected by attending color or temporal frequency within the stimulus for the *combined* ROI. This illustrates that while both tasks caused similar pRF changes, these effects were generally more pronounced when attending color.

In order to quantify the modulation of feature-based attention per voxel we first setup a single robust index of the degree to which spatial attention resampled visual space, combining changes in pRF eccentricity and size (as these were highly correlated, see Figure 3C). This Attentional Modulation Index (AMI, see Methods) is depicted in Figure 5B for the *combined* ROI when attending color and TF. We then quantified the difference in this attentional modulation index between attending color and temporal frequency as a feature-based Attentional Modulation Index (feature AMI, see Methods). Positive values of feature AMI indicate that attending color induced greater pRF changes, while negative values indicate that attending TF lead to stronger pRF changes. Figure 5C shows that this feature AMI was positive across eccentricity in the *combined* ROI. Inspecting the average feature AMI across voxels within each ROI (Figure 5D) reveals that attending changes in color compared to TF in the bar stimulus produced stronger spatial resampling in all ROIs ( $p$ 's < .01, see Supplementary Tables 8 and 23).

#### Feature AMI and feature preference

The feature-based modulations we describe above are possibly related to differences in bottom-up preference for the attended features. Feature-based attention is known to increase activity of neurons selective for the attended feature, regardless of spatial location (Treue and Maunsell, 1996; Treue and Trujillo, 1999; McAdams and Maunsell, 2000; Maunsell and Treue, 2006; Müller et al., 2006; Zhang and Luck, 2009; Zhou and Desimone, 2011). If voxels contain on average more color-preferring compared to TF-preferring neurons, attending color should therefore activate a greater amount of neurons, potentially leading to a greater apparent shift of the aggregate pRF. To test this hypothesis, we estimated the difference in response amplitude to the presence of color and temporal frequency within a full-field stimulus (in a separate experiment, see Methods). We then summarized each voxels' relative preference for color and temporal frequency

by means of a feature preference index. Higher values of this feature preference index indicate greater preference for color compared to TF. Figure 5E (and Supplementary Figure 10) displays the feature AMI as a function of feature preference, for each ROI. Note that feature preference was negative on average in most ROIs, suggesting that our TF manipulation (7 vs 0 Hz grayscale Gabors) caused stronger response modulations compared to our color manipulation (colored vs grayscale Gabors). Although this induced an offset across the brain, variations in this measure across ROIs replicate known specializations of the visual system with high precision (Liu and Wandell, 2005; Brouwer and Heeger, 2009, 2013): while areas MT+ and V1 show the strongest preference for TF compared to color, areas V4 and VO show the strongest preference for color compared to TF. Importantly, regardless of these large variations in feature preferences between MT+/V1 and VO/hV4, average feature AMI was nearly equal in these ROIs. In addition, there was no correlation between feature preference and feature AMI across all ROIs ( $R = .20$ ,  $p = .608$ ,  $N = 9$ ,  $\rho = .37$ ,  $p = .332$ ,  $N = 9$ ). These results show that the feature-based attentional modulations we observe occur globally across the brain, and do not depend on bottom-up feature preference.

#### *Feature preference and spatial sampling*

What could then explain the fact that attending color in the stimulus induced greater changes in spatial sampling? Behavioral studies have suggested that the influence of spatial attention should be adjusted by feature-based attention in order to improve sampling of attended visual features (Yeshurun et al., 2008; Barbot and Carrasco, 2017). One of the factors that influences required spatial resampling is pRF size. Smaller pRFs need to shift a greater distance in order to bring a stimulus into their responsive region. This means that if color-preferring voxels are relatively small, this creates a requirement of greater shifts when attending color. Indeed, both pRF size (Dumoulin and Wandell, 2008) and color compared to TF preference (Curcio et al., 1990; Azzopardi et al., 1999; Brewer et al., 2005) are known to be strongly eccentricity dependent such that foveal voxels have relatively small pRFs and are relatively color sensitive. We also clearly observe both effects in our data (see Figure 1B and Supplementary Figure 1; and Figure 6 and Supplementary Figure 11, correlation between feature-preference and eccentricity is negative except in

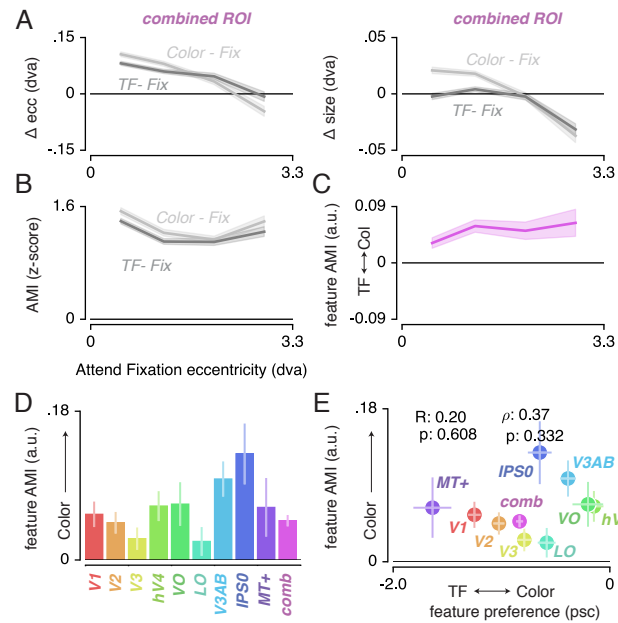

Figure 5: Feature-based attentional modulation across ROIs. A. Differences in pRF eccentricity and size relative to the *Attend Fixation* condition, for both the *Attend Color* and *Attend TF* condition. The changes in both eccentricity and size are more pronounced when attending changes in color versus TF changes in the bar. B. The Attentional Modulation Index (AMI) combines eccentricity and size changes to form one robust index of spatial attention and is greater when attending color compared to TF. C. The feature AMI quantifies this difference. Positive values of this feature AMI across eccentricity confirm stronger pRF modulations when attending color compared to TF. D. Average feature AMI for each ROI, extending greater observed pRF modulations when attending color compared to TF to all individual ROIs. E. Average feature AMI as a function of average feature preference across ROIs. Feature preference increases with higher color compared to TF preference. Although hV4 and VO are relatively sensitive to color and MT+ is relatively sensitive to TF, feature AMI is comparable in these areas. Errorbars denote 95% CI over voxels.

LO and VO, see Supplementary Tables 9 and 24). This means that the greater amount of spatial resampling when attending color can be parsimoniously explained by color being sampled by relatively smaller pRFs.

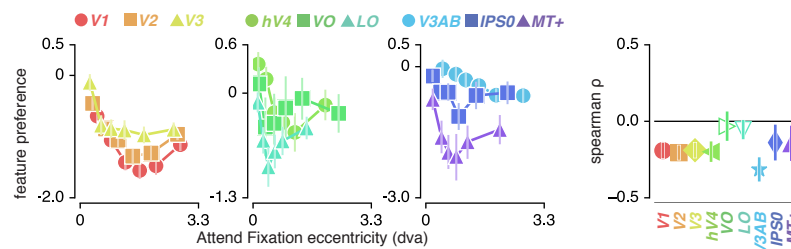

Figure 6: Feature preference and eccentricity. Preference to color compared to TF is greatest near the fovea. Errorbars denote 95% CI over voxels.

#### Feature-based attention influences attentional gain field precision

Smaller pRFs also require a more precise attentional gain field to shift a given distance (a property of the multiplication of Gaussians). Combining this with our observation that pRFs experience greater shifts when attending color, we predict that attentional gain fields should be more precise in this condition. In order to test this, we repeated the attentional gain field modeling procedure described above, replacing the *Attend Stimulus* data with the *Attend Color* and *Attend TF* data in two separate fit procedures. Indeed, this returned smaller fitted stimulus attentional gain field sizes in the *Attend Color* compared to the *Attend TF* fit procedure (Figure 7 left panel) both in the *combined ROI* (0.094 dva smaller over subjects when attending color,  $t(4) = 9.021$ ,  $p = .001$ , cohen's  $d = 4.511$ ) and across ROIs (median over ROIs on average 0.061 dva smaller over subjects when attending color,  $t(4) = 4.243$ ,  $p = .013$ , cohen's  $d = 2.121$ ). As the *Attend Fixation* data was used as input in both modeling procedures, we verified that the estimated fixation attentional gain field was not different between procedures (Figure 7 right panel;  $p$ 's of .693 and .224 and cohen's  $d$  of -0.213 and -0.719 for across ROIs and *combined ROI* respectively). These analyses show that the stronger influence of spatial attention when attending color is realized by a more precise attentional gain field located at the stimulus. In sum, our results suggest that (1) the attentional system adjusts its influence in accordance with the spatial sampling



characteristics of units that prefer the attended feature and (2) that it does this equally across visual regions regardless of their bottom-up feature preference.

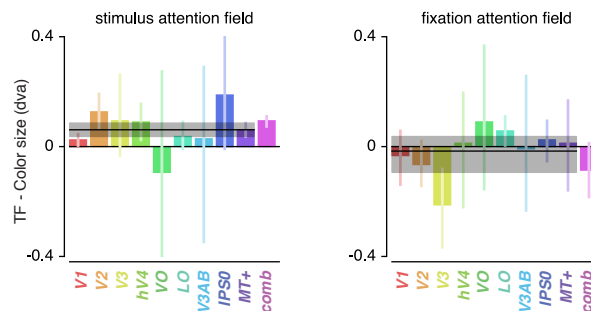

Figure 7: Feature-based attentional modulation of attentional gain field sizes. The greater effects of attention to color compared to TF are caused by more precise attentional gain fields toward the stimulus. Error bars represent 95% CI over subjects. Black horizontal lines indicates median attentional gain field size difference over ROIs, with shaded area representing 95% CI over subjects.

### Task and Fixation Performance

Finally, we verified that the pRF results were not affected by differences in fixation accuracy or behavioral performance (see Figure 8). To provide evidence in favor of these null hypothesis, we performed JZL Bayes factor analyses (using JASP; Love et al. (2015)). We rotated recorded eye position to the direction of bar movement and computed the median and standard deviation of position along this dimension across bar passes per bar position (Figure 8B). We next setup a model including the factor of attention condition (3 levels), bar position (24 levels), and their interaction. We found that when predicting gaze position, the evidence was in favor of the null hypothesis with a Bayes Factor (BF) of 18620. When predicting gaze variability however, we found evidence against the null hypothesis with a BF of 5.980. Evidence for including each of the factors (condition, bar position, and their interaction) into the model returned BFs of 0.713, 547.193 and 0.017 respectively. The BF of 0.713 for the factor of condition means that we cannot determine whether gaze variability was different between conditions. However, even if this would be the case, this could only lead to an offset in pRF size and not to changes in pRF posi-

tion (Levin et al., 2010; Klein et al., 2014; Hummer et al., 2016). As we observe a complex pattern of both pRF size and eccentricity in- and decreases, a difference in gaze variability cannot explain the attentional modulations of pRF parameters we observed. More importantly, these analyses also showed that although bar position influenced gaze variability (BF of 547.193), it did not do so differently between attention conditions (BF of 0.017). Using a similar approach, we then tested whether a model including attention condition (3 levels) and stimulus eccentricity (3 levels) influenced behavioral performance (Figure 8A). This returned evidence for the null hypothesis with a BF of 6.25. Together, these results show that differences in pRF parameters between conditions cannot be explained by either fixation accuracy or behavioral difficulty.

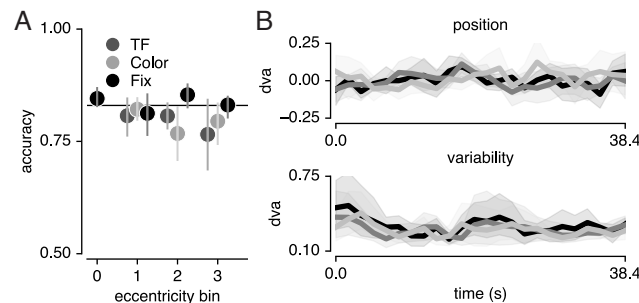

Figure 8: Task and fixation performance A. Behavioral accuracy per attention condition and per bar stimulus eccentricity bin. Horizontal line denotes Quest target of 83%; chance level was 50%. B. Median (top panel) and standard deviation (bottom panel) gaze position in the direction of bar movement per bar position. Error bars denote 95% CI across 5 participants.

## Discussion

We investigated how spatial and feature-based attention jointly modulate the sampling of visual space. We find that directing covert spatial attention toward a moving bar stimulus altered the eccentricity and size of pRFs in concert. These changes in spatial sampling were parsimoniously explained by an attentional gain field model. Attending color changes within this stimulus induced stronger pRF changes compared to attending temporal frequency changes. These feature-based attentional modulations occurred globally throughout the brain, irrespective of a visual region's average feature preference. We sug-

gest that the greater degree of spatial resampling when attending color is related to smaller pRF sizes in relatively color preferring voxels. In addition, we show that the greater degree of spatial resampling when attending color is caused by a more precise attentional gain field on the stimulus.

The average changes in pRF size and eccentricity for each visual region are largely consistent with previous studies where attention was devoted to a peripheral stimulus versus fixation (Kay et al., 2015; Sheremata and Silver, 2015). More specifically, we systematically investigated the spatial structure of the complex pattern of pRF changes that resulted from such differential spatial attention. The resulting characterization details how the sampling of visual space by single voxel pRFs is affected by spatial attention, which is of specific relevance for future studies that determine spatial selectivity for voxel selections. First, we show that attending the stimulus compared to fixation caused pRFs to shift radially. Although a previous study reported a dominant horizontal shift direction (Sheremata and Silver, 2015), we suggest that the overrepresentation of the horizontal meridian (Schneider et al., 2004; Swisher et al., 2007) made radially shifting pRFs to appear as predominantly horizontal changes. Second, we report closely coupled pRF eccentricity and size changes that depended on pRF eccentricity. Specifically, we found that parafoveal pRFs shifted toward the periphery and increased in size while peripheral pRFs shifted toward the fovea and decreased in size. This finding supports the resolution hypothesis of attention (Anton-Erxleben and Carrasco, 2013), which posits that spatial attention acts to reduce resolution differences between the fovea and periphery. We note that the functional implication of pRF size changes was recently questioned, as stimulus encoding fidelity was shown to be unaffected by pRF size changes (Vo et al., 2017). However, the exact functional significance of changes in pRF size bears no consequence for the conclusions currently presented. Due to the strong correlation we observed between pRF eccentricity and size changes, we combined both measures into a single robust index. Our relevant quantifications are therefore agnostic to the potentially separable functional implications of changes in pRF size and eccentricity.

The pattern of pRF shifts we observe is well described by an attentional gain field model (Reynolds and Heeger, 2009; Klein et al., 2014). First, this highlights that a simple and well-understood mechanism underpins the apparent complexity of the observed pat-

tern of pRF changes. Second, it extends the utility of such attentional gain field models to situations where attention is dynamically deployed over space and time during the mapping of the pRF (Kay et al., 2015). In agreement with earlier reports (Klein et al., 2014; Puckett and DeYoe, 2015), we found that the best-fitting model implemented comparable attentional gain field sizes across visual regions. This strongly points to spatial attention being implemented as a global influence across visual cortex. We conclude that differences in pRF shift patterns between different visual regions depended primarily on differences in visual sampling (i.e. differences in pRF center and size distributions) rather than on differing attentional influences. Despite the broad correspondence between model fits and data, the model did not capture the observed decreases in pRF eccentricity of the most foveal pRFs in V1. Two recent studies showed that in early visual areas, spatial attention shifted pRFs away from the attended location, but toward the attended location in higher visual areas (de Haas et al., 2014; Vo et al., 2017). Other studies showed that in precisely these visual regions, both the pRF and the attentional gain field are composed of a suppressive surround in addition to their positive peak (Zuiderbaan et al., 2012; Puckett and DeYoe, 2015). We leave the question whether these suppressive surrounds could explain such repulsive shifts in lower visual cortex for future research. As a more general aside, gain fields have been shown to influence visual processing at the motor stage (van Opstal et al., 1995; Snyder et al., 1998; Trotter and Celebrini, 1999). Thus, our results further establish the close link between attentional and motor processes (Rizzolatti et al., 1987; Corbetta et al., 1998).

Of particular interest, we showed that the changes in visual space induced by spatial attention were stronger when attending color compared to when attending temporal frequency. This occurred throughout the brain, irrespective of visual regions' preference for the attended features. In other words, while MT+ and V4 differed greatly in their relative feature preference, both areas showed comparable pRF changes resulting from differences in feature-based attention. This stands in apparent contrast with previous studies reporting that feature-based attention selectively enhances responses in cortical areas specialized in processing the attended feature (Corbetta et al., 1990; Chawla et al., 1999; O'Craven et al., 1999; Schoenfeld et al., 2007; Baldauf and Desimone, 2014). However, attending a stimulus consisting multiple features was shown to spread attentional

response modulations of one of the object's feature dimensions to other constituent feature dimensions (Katzner et al., 2009; Çukur et al., 2013; Kay and Yeatman, 2017), albeit somewhat later in time (+/- 60ms; Schoenfeld et al., 2014). This could mean that the global pattern of pRF shifts we observed is caused by such an object-based attentional transfer mechanism. In addition, changing the sampling of visual space globally throughout the brain enhances stability in the representation of space. Different modifications of visual space per visual region would require an additional mechanism linking different spatial representations. Instead, the global nature of spatial resampling we observe supports a temporally dynamic but spatially consistent adaptation of visual space.

The greater degree of spatial resampling when attending color can be explained by differences in spatial sampling in voxels that prefer color compared to temporal frequency. Behavioral studies have suggested that feature-based attention should modulate the strength of spatial resampling in order to improve sampling of attended features (Yeshurun et al., 2008; Barbot and Carrasco, 2017). One of the factors that determines the required degree of spatial resampling is receptive field size. Specifically, smaller pRFs need to shift a greater distance in order to bring a stimulus into their responsive region. Both our data and previous findings show that pRF size (Dumoulin and Wandell, 2008) and color compared to temporal frequency preference (Curcio et al., 1990; Azzopardi et al., 1999; Brewer et al., 2005) vary across eccentricity such that foveal voxels have smaller pRFs and are more color sensitive. This means that color is sampled by smaller pRFs than temporal frequency. Attending color in the stimulus therefore required a greater degree of spatial resampling in order to optimally sample the attended feature. In addition, gain field models of attention predict that smaller pRFs require a more precise attentional gain field in order to shift a given distance. Indeed, our results showed that attending color versus temporal frequency resulted in more precise attentional gain fields directed toward the bar stimulus. Together, this shows that the larger degree of spatial resampling we observed when attending color can be parsimoniously explained by smaller pRF size in voxels that prefer color over temporal frequency. Yet, as pRF size is so strongly related to pRF eccentricity, we can not exclude an influence of pRF eccentricity above and beyond pRF size. However, receptive field size is suggested to be crucial in the eccentricity dependence of attentional influences observed in behavior (Yeshurun

and Carrasco, 1998, 1999; Anton-Erxleben and Carrasco, 2013). Therefore, although differential influences of attention across eccentricities have been observed before in the brain (e.g. Roberts et al., 2007; Bressler et al., 2013), these are likely brought about by differences in pRF size. In sum, our results confirm the notion that the endogenous attentional system is able to take into account the spatial sampling properties of units that prefer the attended feature, and that it adjusts the strength of its influence accordingly (Yeshurun et al., 2008; Barbot and Carrasco, 2017).

Electrophysiological studies on the interaction between feature-based and spatial attention generally measure overall response amplitudes instead of changes in spatial sampling. This showed that interactions between feature-based and spatial attention are weak to non-existent in relatively early stages of processing (David et al., 2008; Hayden and Gallant, 2009; Patzwahl and Treue, 2009; Zhang and Luck, 2009), but develop at later stages of visual processing (Hillyard and Munte, 1984; Handy et al., 2001; Andersen et al., 2011; Bengson et al., 2012; Ibos and Freedman, 2016, but see Egner et al. (2008)). We add to this (1) that feature-based attention modulates the effects of spatial attention on spatial re-sampling and (2) that these interactions occur globally throughout the brain, manifesting themselves even in the earliest cortical visual regions. Interactions between spatial and feature-based attention in early stages of processing could be concealed when focusing on changes in response amplitude instead of changes in spatial sampling. However, it is important to note that measuring spatial sampling at the level of voxels does not allow us to determine whether observed changes in spatial sampling are due to changes in spatial sampling of individual neurons, or rather due to differential weighting of subpopulations of neurons within a voxel. Nevertheless, it has been shown that spatial attention does influence spatial sampling of individual neurons (Connor et al., 1997; Womelsdorf et al., 2006). Yet, future studies are required to extend our conclusions regarding the interactions between feature-based and spatial attention to the single neuron level.

Another important remaining question pertains to the source of the interactions between feature-based and spatial attention. Signals of spatial selection are thought to originate from a network of frontal and parietal areas, identified using fMRI (Shulman, 2002; Silver et al., 2005; Jerde et al., 2012; Sprague and Serences, 2013; Szczepanski et al., 2013; Kay and Yeatman, 2017; Mackey et al., 2017), and electrophysiology (Moore and Arm-

strong, 2003; Gregoriou et al., 2009). As we focused on careful measurement of spatial sampling in feature sensitive visual cortex with a relatively small stimulus region, we did not include the frontoparietal regions containing large receptive fields into our analyses. A recent study suggested a central role for the ventral prearcuate gyrus for conjoined spatial and feature-based attentional modulations (Bichot et al., 2015). Correspondingly, signals of feature selection in humans have been localized to a likely human homologue of this area, the inferior frontal junction (IFJ; Zanto et al., 2010; Baldauf and Desimone, 2014). This region is therefore a possible candidate for controlling the interactions between feature-based and spatial attention.

In sum, we show that visuospatial sampling is not only affected by attended locations but also depends on the spatial sampling properties of units that prefer attended visual features. The global nature of these modulations highlights the flexibility of the brain's encoding of sensory information in order to meet task demands (Rosenholtz, 2016).

## *Materials and Methods*

### *Participants*

Five participants (2 female, 2 authors, aged between 25 - 37) participated in the study. All gave informed consent, and procedures were approved by the ethical review board of the University of Amsterdam, where scanning took place.

### *Apparatus*

#### *MRI acquisition*

All MRI data was acquired on a Philips Achieva 3T scanner (Philips Medical Systems), equipped with a 32-channel head coil. T1 weighted images were acquired for each participant with isotropic resolution of 1 mm<sup>3</sup>, repetition time (TR) of 8000 ms, TE of 3.73 ms, flip angle of 8°. Functional T2\* weighted data consisted of 30 2D slices of echo planar images (EPI) with isotropic resolution of 2.5 mm<sup>2</sup>, with a 0.25 mm slice gap, TR of 1600 ms, TE of 27.62 ms, and a flip angle of 70°. Each participant completed between 6 to 8 Attention-pRF Mapping runs (20 min each) and 2-3 Feature preference and HRF

Mapping runs (10 min each), spread over 2 (N = 1) or 3 (N = 4) sessions within a 2 week period (see Experimental Design).

#### *Gaze recording*

During all functional runs, gaze position was recorded using an Eyelink 1000 (SR Research, Osgoode, Ontario, Canada), sampled at 1000 Hz. A 9-point calibration-validation procedure was run at the start of each session.

#### *Stimulus presentation*

Visual stimuli were created in PsychoPy (Peirce, 2008) and run on a 15 inch 2013 MacBook Pro Retina. Participants viewed a 32 inch BOLD screen (resolution: 1920 x 1080, refresh rate: 100 Hz; Cambridge Research Systems), at 156 cm distance of the participants' eyes at the end of the bore, via a helmet-mounted front-silvered mirror. Auditory stimuli were presented through headphones using the MRConfon system.

### *Experimental Design*

#### *Attention-PRF Mapping Stimulus*

A bar stimulus of 0.9 degrees of visual angle (dva) width traversed a circular aperture of 7.2 dva in one of eight directions (cardinal and diagonal orientations in both directions, see Figure 9A), completing a full pass in 38.4 s by stepping 0.34 dva every 1.6 s, and pausing 4.8 s between each bar pass. One run contained 24 bar passes in total (3 for every direction), plus four blank periods of 38.4 s when no bar stimulus was shown. Throughout the experiment, a gray disk of 9.6 arcmin (60 cd/m<sup>2</sup>), with a 4.2 arcmin black rim (0 cd/m<sup>2</sup>) was present on the screen as a fixation mark. The bar stimulus was composed of 1500 Gabor elements (4.34 cycle/dva spatial frequency, 9 arcmin sd, average luminance of 60 cd/m<sup>2</sup>) projected over a dark-gray background (15 cd/m<sup>2</sup>). Three times per bar location (i.e. every 533 ms), Gabor element parameters were updated to a new random location (uniformly distributed over the spatial extent of the bar at full width), a random orientation (uniformly drawn between 0 - 360°), a random color combination (either blue-yellow (BY), or cyan-magenta (CM)) and a random new temporal frequency (TF; either high or low). The high and low temporal frequencies were chosen per participant



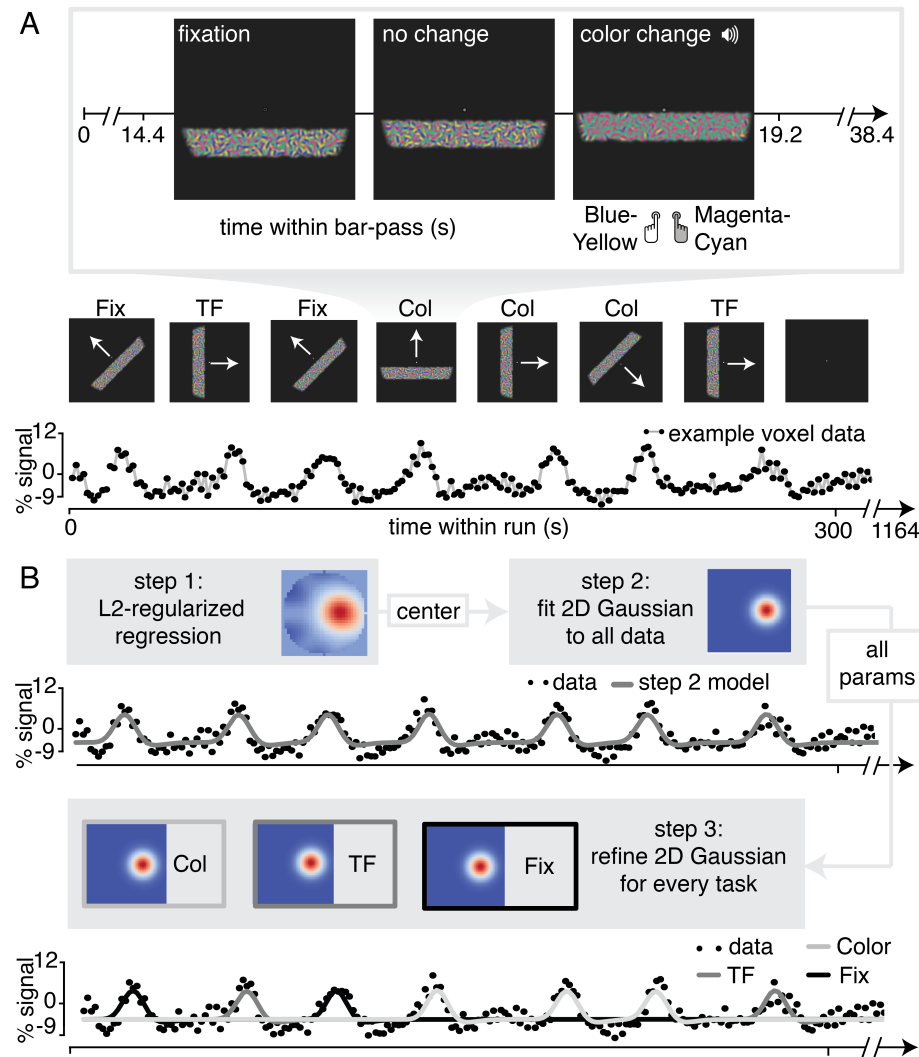

Figure 9: Experimental Design and pRF Fitting procedure. A. Experimental Design. Throughout a bar pass participants reported either changes in color (*Attend Color*) or temporal frequency (*Attend TF*) of Gabor elements within the moving bar stimulus, or changes in fixation mark luminance (*Attend Fixation*), while maintaining accurate fixation. Participants were informed auditorily about the upcoming task 2 s before each bar pass. B. Overview of pRF fitting procedure. pRF parameters were estimated from each voxel's BOLD signal time course in a three step procedure. First, a design matrix was constructed based on 31x31 pixels' visual stimulation time course of the entire experiment, which was convolved with a participant-specific HRF (derived from separate data, see *Feature preference and HRF Mapper*). L2-regularized regression was used to find the position of the spatial response profile's peak of each voxel. Second, to find precise estimates of pRF center location and size we used a more finegrained 101x101 design matrix and gradient descent to fit a single parameterized 2D Gaussian pRF model to data from all attention conditions combined, initialized at the L2-regression derived peak location. Third, 2D Gaussian pRF models were fitted to data from the different attention conditions separately, initialized with the parameters resulting from step 2.

to facilitate their ability to distinguish TF changes (6 and 4 Hz in 3 participants, 7 and 3 Hz in 2 participants). The overall color and/or TF composition of the bar was transiently altered on some of these parameter updates, by changing the ratio of Gabor elements assigned either color combination or either TF (as targets for the behavioral tasks, see below). The temporal predictability of these events was minimized by randomly drawing occurrences according to an exponential distribution (mean 4 s, minimum 2 s). Additionally, the fixation mark central disk luminance either increased or decreased, with probability and duration of these occurrences identical to those of changes in the bar stimulus composition. These three types of transients (fixation mark luminance, bar color and TF composition) were independent, meaning they were randomly interleaved and could be combined on the screen. Importantly, this design ensured that physical stimulation was equated across all three attention conditions, which we describe below.

#### *Attention-PRF Mapping Task*

For an overview of the stimulus and behavioral task, see Figure 9A. Before each bar pass an automated voice (Apple OSX Dictation voice ‘Kathy’) informed participants to perform a 2-alternative forced-choice task (2AFC) on one of the three stimulus parameter deviations. Task-relevant visual stimulus changes were accompanied by an auditory pure tone (440 Hz). This auditory cue alerted the participant to respond, while task-irrelevant stimulus changes occurred independently and without warning tone. This ensured that all task-related information was conveyed to the participant by auditory means, without concurrent changes in visual stimulation. The different stimulus changes (i.e. color, TF and fixation luminance) occurred independently and thus sometimes simultaneously, rendering the auditory tone not reliably predictive of the stimulus dimension to attend. Therefore, participants needed to stably maintain condition-specific top-down attention throughout the duration of a bar pass. In the *Attend Color* condition, participants judged the relative predominance of Blue-Yellow or Cyan-Magenta Gabor elements in the bar stimulus, while in the *Attend TF* condition, participants judged the relative predominance of high compared to low TF Gabor elements in the bar stimulus. We chose color and TF as these features are known to be processed markedly differently in the visual system. While color is preferentially processed by the ventral visual areas V4 and VO, temporal

information is known to be processed preferentially by area MT+ (Liu and Wandell, 2005; Brouwer and Heeger, 2009, 2013). We specifically chose TF and not coherent motion, as coherent motion signals have been shown to influence pRF measurements (Harvey and Dumoulin, 2016). Both color and TF have been shown to be able to capture attention (Wolfe and Horowitz, 2004; Cass et al., 2011). In the *Attend Fixation* condition, participants judged whether the central disk of the fixation mark increased or decreased in luminance. The magnitude of the stimulus changes was titrated by means of a Quest staircase procedure (Watson and Pelli, 1983), set to approximate 83% correct performance. In order to equate task difficulty across not only conditions but also bar stimulus eccentricity, we used separate Quest staircases at three different bar stimulus eccentricities in each of the attention conditions. Additionally, there was a separate staircase for the *Attend Fixation* task when no bar stimulus on screen. This made for a total of 10 separate staircases during the experiment. Participants extensively practiced the task outside the scanner and staircases were reset before scanning. Each experimental run contained one bar pass per task condition, per direction, in random order (total of 24 bar passes per run).

### 553 *Feature preference and HRF Mapper*

554 We performed a separate randomized fast event-related fMRI experiment in order to  
555 (1) determine each voxels' relative preference for color and TF, and (2) to find the pa-  
556 rameters that best described each participants' HRF, to be used in the pRF estimation  
557 procedure (see below). Full-field stimuli consisted of 8000 Gabor elements, uniformly  
558 distributed throughout the full circular aperture traversed by the pRF mapping stimulus  
559 ensuring identical density compared to the pRF mapping stimulus. Also, every 533 ms,  
560 all Gabor elements were assigned a new random orientation and location. These stimuli  
561 were presented for 3.2 s, with an inter-trial interval of 3.2 s. In a full factorial 2 x 2 de-  
562 sign, we varied the color and TF content of the stimulus in an on-off fashion. That is, the  
563 TF of the Gabor elements was either 0 or 7 Hz, and the elements were either grayscale  
564 or colored (balanced BY/CM). Trial order was determined based on an M-sequence (Bu-  
565 račas and Boynton, 2002), with no-stimulus (null) trials interspersed as a fifth category  
566 of trials. During this experiment, participants performed the same 2-AFC fixation-point  
567 luminance task as in the Attention-pRF Mapping Task (*Attend Fixation*), using a separate

staircase. A single HRF was determined per participant using the R1-GLM approach (Peregosa et al., 2015), on data from all conditions. The median HRF from the 1000 most responsive voxels (highest beta-weights in the colored high TF condition) was used as the participant specific HRF.

## *Data analysis*

### *MRI Preprocessing*

T1-weighted images were first segmented automatically using Freesurfer, after which the pial and grey/white matter surfaces were hand-edited. Regions of interest (ROIs) were defined on surface projected retinotopic maps using Freesurfer without the use of spatial smoothing. For every participant, one session's EPI image was selected as the target EPI, which was registered to his/her Freesurfer segmented T1-weighted image using the bbregister utility, after which the registration was hand-adjusted. Then, all EPI images were first motion corrected to their middle volume using FSL (Jenkinson et al., 2012) MCFLIRT to correct for within run motion. Then, all EPI images were registered both linearly (using FLIRT) and non-linearly (using FNIRT) to the mean-motion corrected target EPI to correct for between run and session motion and inhomogeneities in B0 field. Low frequency drifts were removed using a 3rd order savitzky-golay filter (Savitzky and Golay, 1964) with a window length of 120s. Arbitrary BOLD units were converted to percent-signal change on a per-run basis.

### *pRF fitting procedure*

pRF fitting and (statistical) parameter processing was performed using custom-written python pipeline available at [https://github.com/daanvanes/pRF\\_attention\\_analyses](https://github.com/daanvanes/pRF_attention_analyses). Links to the data files required to reproduce the figures and analyses can be found in the readme of this repository. The fitting routines heavily relied on the scipy and numpy packages. We approximated the pRF by a two-dimensional isotropic Gaussian function. For an overview of our pRF fitting procedure, see Figure 9B. A predicted timecourse for a given Gaussian function can be created by first computing the overlap of this function with a model of the stimulus for each timepoint, and then convolving this overlap with the participant-specific HRF (Dumoulin and Wandell, 2008). It is

possible to find these Gaussian parameter estimates using a minimization algorithm, but such an approach is at risk of missing the global optimum when parameters are not initialized at appropriate values. Recently, a model-free reverse-correlation-like method was developed, generating a pRF spatial profile without requiring any pre-set parameters (for details see Lee et al. (2013)). Briefly, we employed this method using L2 regularized (Ridge) regression on a participant-specific-HRF convolved design matrix coding the stimulus position in a 31x31 grid for each timepoint, predicting data from all attention conditions together. Using a high regularisation parameter ( $\lambda = 10^6$ ), we used this procedure not to maximize explained signal variance, but to robustly determine the pRF center, which was defined as the position of the maximum weight. Having determined these approximate initial values for the pRF center, we next initialized a minimization procedure (Powell (1964) algorithm) at these location values, fitting position ( $x, y$ ), size, baseline and amplitude parameters of an isotropic 2D Gaussian to data from all conditions together using a design matrix with size 101x101 for enhanced precision. Then, all resulting Gaussian parameters were used to initialize a second minimization procedure which fitted a Gaussian for each attention condition separately at the same time (all parameters independent except for one shared baseline parameter). This approach allowed us to recover fine-grained differences in pRF parameters under conditions of differential attention.

#### pRF selection

We discarded pRFs that were either at the edge of the stimulus region (above 3.3 dva in the *Attend Fixation* condition), or had size (standard deviation) larger than our stimulus diameter (7.2 dva) in any of the tasks. Additionally, each voxel's contribution to all analyses was weighted according to the quality of fit of the pRF model, which was defined as 1 minus the ratio of residual to observed variance:

$$R^2 = 1 - \frac{\sum_i (m_i - p_i)^2}{\sum_i (m_i - \bar{m}_i)^2} \quad (1)$$

where  $i$ ,  $m$  and  $p$  refer to voxel index, measured BOLD time-course and predicted time-course respectively. We disregarded voxels with an  $R^2 < .1$ .

#### 624 *pRF parameter analyses*

625 The statistical approach used to combine pRF results across participants was similar  
626 to that of two recent and comparable studies (Klein et al., 2014; Kay et al., 2015), that  
627 adopted a ‘dense sampling of individual brain approach’ (Poldrack, 2017). This approach  
628 favours careful measurement of individual brains at the expense of large sample sizes in  
629 terms of the number of subjects. After defining visual ROIs per participant using standard  
630 retinotopic mapping procedures (Dumoulin and Wandell, 2008), this entailed pooling  
631 voxels for each ROI across participants. Statistics are then computed over this collection  
632 of voxels, much akin to the way in which neurons are often pooled across monkeys. In  
633 order to provide additional estimates of stability across participants, we also performed all  
634 analyses for each participant separately, the results of which can be found in the Statistical  
635 Appendix.

636 Except for the Rayleigh tests (Supplementary Table 2) p-values and confidence inter-  
637 vals were computed using  $10^5$  fold bootstrap procedures. To test whether bootstrapped  
638 distributions differed from a certain threshold, p-values were defined as the ratio of boot-  
639 strap samples below versus above that threshold multiplied by 2 (all reported p-values  
640 are two-tailed). In order to provide maximally robust estimates of central tendency and  
641 variance of parameter estimates, we excluded outliers using a threshold of five two-sided  
642 median absolute deviations. As this outlier rejection was performed for each analysis  
643 separately, this resulted in slightly different number of voxels included in each analysis  
644 (see Ns in statistics tables). Outlier rejection was performed either per visual field bin  
645 (cf. Figure 1B, 2B/D, 3A/B, 4A/B/D/E/F, 5A/B, scatters in Figure 6), per percentile bin  
646 (cf. Figure 3C), or per ROI (cf. Figures 2C, 5D/E). When analyses are performed across  
647 participants outliers were again rejected at the voxel level per participant, but all partici-  
648 pants were always included (cf. 4A/B/C/D/E/F and 7). When comparing correlations to  
649 0, correlations were Fisher transformed using the inverse hyperbolic tangent function.

#### 650 *Feature attention modulation index*

651 We computed a per-voxel index to quantify how strongly feature-based attention  
652 modulated the effects of spatial attention on spatial sampling (feature-based attention  
653 modulation index, or feature AMI). This measure combined pRF eccentricity and size

parameters, as our results showed that spatial attention affected these parameters in concert (see Figure 3). Per voxel and per attention condition to the bar stimulus, (*Attend Color* and *Attend TF*) we set up a two-dimensional vector containing difference in pRF eccentricity and size relative to the *Attend Fixation* condition. pRF size and eccentricity differences were normalized respective to their variance in the *Attend Stimulus* condition to ensure that both measure contributed equally to the feature AMI. We then computed a feature AMI by dividing the difference between the norms of these vectors by their sum. This way, positive values of feature AMI indicate greater spatial attention effects on pRF parameters in the *Attend Color* condition than in the *Attend TF* condition and vice versa. Note that this measure abstracted out both the affected pRF parameter (i.e. eccentricity and size) and the sign of these changes (i.e. shifts toward the fovea or periphery and increases or decreases in size).

#### Attentional Gain Field modeling

To provide a parsimonious mechanistic account for how attention to the moving bar stimulus changed pRF position, we adapted an existing attentional gain model of attention (Womelsdorf et al., 2008; Reynolds and Heeger, 2009; Klein et al., 2014). This model conceptualizes the measured Gaussian pRF as the multiplication between a Gaussian stimulus-driven pRF (*SD*, i.e. the pRF outside the influence of attention), and a Gaussian attentional gain field (*AF*). Following the properties of Gaussian multiplication, the narrower the *AF* the stronger the influence on the *SD*, and the narrower the *SD* the smaller the resulting shift. An overview of model mechanics is shown in Figure 10. We estimated the *SD* by dividing the measured *Attend Fixation* pRF by an *AF* at fixation ( $AF_{fix}$ , Figure 10A). As attention to the stimulus shifted the locus of attention as the bar moved across the screen, we modeled the effect of attention for each bar stimulus position separately (Figure 10B). Each unique bar stimulus (24 bar positions for each of 8 directions) was convolved with a Gaussian kernel ( $AF_{stim}$ ) and multiplied with the estimated *SD*. This yielded one predicted pRF per bar position. These predicted pRFs were then scaled to a maximum of 1 and averaged over the different bar positions. This averaged profile essentially represented the pRF ‘smeared’ across visual space as spatial attention moved along with the bar stimulus throughout the recording. The peak of this averaged profile was

then designated as the predicted pRF center location in the *Attend Stimulus* condition (Figure 10C). Thus, the modeling procedure consisted of two separate AFs, one at fixation ( $AF_{fix}$ ) and one convolved with the bar stimulus ( $AF_{stim}$ ), which were estimated at the same time. The input to the model was the *Attend Fixation* pRF, and the output was the predicted position for the *Attend Stimulus* pRF. Formally, this is given by:

$$pRF_{stimpos} = \operatorname{argmax} \left( \frac{1}{n} \cdot \sum_{t=0}^n \left( \frac{(dm_{(t)} * AF_{stim}) \cdot (pRF_{fix}/AF_{fix})}{\max((dm_{(t)} * AF_{stim}) \cdot (pRF_{fix}/AF_{fix}))} \right) \right) \quad (2)$$

where  $(dm_{(t)} * AF_{stim})$  represents the stimulus design matrix at timepoint  $t$  convolved with the AF toward the stimulus,  $(pRF_{fix}/AF_{fix})$  represents the estimation of the SD, and the denominator ensures scaling to a maximum of 1. To estimate how well a set of AF parameters fit the data across the entire visual field, we minimized the L2 distance between the predicted and measured *Attend Stimulus* pRF positions of the 64 vectors derived from the quadrant visual field format of Figure 2B. AF sizes were determined at an ROI level, thus assuming that attention influenced all pRFs within an ROI similarly, while possibly varying between ROIs. The model was evaluated for a 50 x 50 evenly spaced grid of AF sizes, where the AF at fixation varied between 1.5-2.5 dva, and the AF convolved with the stimulus varied between 0.6-1.6 dva (i.e. 0.02 dva precision). The convolution between the stimulus and the  $AF_{stim}$  resulted in effective AF size to be 0.9 (bar stimulus width) larger than the  $AF_{stim}$  itself. These parameter ranges therefore result in equal effective AF sizes. Reported sizes are the standard deviation of the 2D Gaussians, with 0.9 (the bar width) added to  $AF_{stim}$  sizes. Modeling was performed for each participant separately.

### Gaze data processing

Gaze data was cleaned by linearly interpolating blinks detected by the EyeLink software. Transient occasions in which the tracker lost the pupil due to partial occlusion by the eyelid leading to high-frequency, high-amplitude signal components were detected and corrected as follows. Pupil size was first high-pass filtered at 10 Hz (the pupil impulse response function is a low-pass filter with a cutoff below 10 Hz (Knapen et al., 2016; Korn and Bach, 2016)), after which those time-points in which the acceleration of pupil



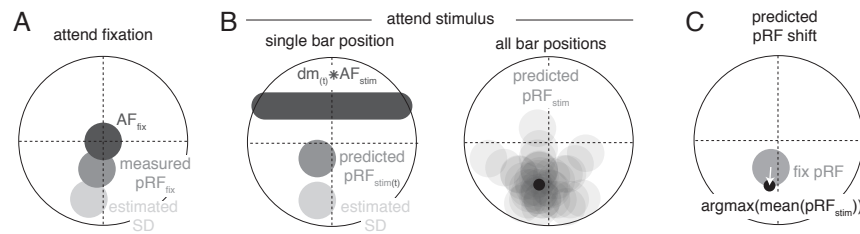

Figure 10: Schematic overview of modeling procedure. A. The Stimulus Drive (SD) was estimated by dividing the measured Attend Fixation pRF by an AF at fixation ( $AF_{fix}$ ). B. Attention toward the bar stimulus at a given timepoint  $t$  was modeled as the multiplication of the estimated SD with the bar stimulus at that timepoint ( $dm_{(t)}$ ) convolved with another AF ( $AF_{stim}$ ). These predicted Attend Stimulus pRFs were averaged over all timepoints. The maximum position of this profile was taken as the predicted Attend Stimulus pRF position. C. The predicted pRF shift ran from the measured Attend Fixation pRF toward the predicted Attend Stimulus position.

size was greater than  $10^5$  mm/s, and their neighbours within 5 s, were replaced with NaN values. Drift correction was performed within each bar-pass by subtracting the median gaze position. All gaze positions were rotated to the direction of bar movement, after which we analyzed the median and variance (standard deviation) of the component in the direction of bar movement (i.e. the component relevant for the pRF measurement).

## References

- Andersen SK, Fuchs S, Mueller MM (2011) Effects of feature-selective and spatial attention at different stages of visual processing. *J Cognitive Neurosci* 23:238–246.
- Anton-Erxleben K, Carrasco M (2013) Attentional enhancement of spatial resolution: linking behavioural and neurophysiological evidence. *Nat Rev Neurosci* 14:188–200.
- Azzopardi P, Jones KE, Cowey A (1999) Uneven mapping of magnocellular and parvocellular projections from the lateral geniculate nucleus to the striate cortex in the macaque monkey. *Vision Res* 39:2179–2189.
- Baldauf D, Desimone R (2014) Neural mechanisms of object-based attention. *Science* 344:424–427.
- Barbot A, Carrasco M (2017) Attention modifies spatial resolution according to task

demands. *Psychol Sci* 28:285–296.

Bengson JJ, Lopez-Calderon J, Mangun GR (2012) The spotlight of attention illuminates failed feature-based expectancies. *Psychophysiology* 49:1101–1108.

Bichot NP, Heard MT, DeGennaro EM, Desimone R (2015) A source for feature-based attention in the prefrontal cortex. *Neuron* 88:832–844.

Bressler DW, Fortenbaugh FC, Robertson LC, Silver MA (2013) Visual spatial attention enhances the amplitude of positive and negative fMRI responses to visual stimulation in an eccentricity-dependent manner. *Vision Res* 85:104–112.

Brewer AA, Liu J, Wade AR, Wandell BA (2005) Visual field maps and stimulus selectivity in human ventral occipital cortex. *Nat Neurosci* 8:1102–1109.

Brouwer GJ, Heeger DJ (2009) Decoding and reconstructing color from responses in human visual cortex. *J Neurosci* 29:13992–14003.

Brouwer GJ, Heeger DJ (2013) Categorical clustering of the neural representation of color. *J Neurosci* 33:15454–15465.

Buračas GT, Boynton GM (2002) Efficient design of event-related fMRI experiments using M-sequences. *NeuroImage* 16:801–813.

Burnett KE, Close AC, d’Avossa G, Sapir A (2016) Spatial attention can be biased towards an expected dimension. *Q J Exp Psychol* 69:2218–2232.

Carrasco M, Yeshurun Y (1998) The contribution of covert attention to the set-size and eccentricity effects in visual search. *J Exp Psychol Human* 24:673–692.

Cass J, van der Burg E, Alais D (2011) Finding flicker: critical differences in temporal frequency capture attention. *Front Psychol* 2:320.

Cepeda NJ, Cave KR, Bichot NP, Kim MS (1998) Spatial selection via feature-driven inhibition of distractor locations. *Percept Psychophys* 60:727–746.

Chawla D, Rees G, Friston KJ (1999) The physiological basis of attentional modulation in extrastriate visual areas. *Nat Neurosci* 2:671–676.

Cohen A, Shoup R (1997) Perceptual dimensional constraints in response selection processes. *Cogn Psychol* 32:128–181.

Cohen MR, Maunsell JHR (2011) Using neuronal populations to study the mechanisms underlying spatial and feature attention. *Neuron* 70:1192–1204.

Connor CE, Preddie DC, Gallant JL, Van Essen DC (1997) Spatial attention effects in

macaque area V4. *J Neurosci* 17:3201–3214.

Corbetta M, Akbudak E, Conturo TE, Snyder AZ, Ollinger JM, Drury HA, Linenweber MR, Petersen SE, Raichle ME, Van Essen DC, Shulman GL (1998) A common network of functional areas for attention and eye movements. *Neuron* 21:761–773.

Corbetta M, Miezin FM, Dobmeyer S, Shulman GL, Petersen SE (1990) Attentional modulation of neural processing of shape, color, and velocity in humans. *Science* 248:1556–1559.

Curcio CA, Sloan KR, Kalina RE, Hendrickson AE (1990) Human photoreceptor topography. *J Comp Neurol* 292:497–523.

Çukur T, Nishimoto S, Huth AG, Gallant JL (2013) Attention during natural vision warps semantic representation across the human brain. *Nat Neurosci* 16:763–770.

Datta R, DeYoe EA (2009) I know where you are secretly attending! The topography of human visual attention revealed with fMRI. *Vision Res* 49:1037–1044.

David SV, Hayden BY, Mazer JA, Gallant JL (2008) Attention to stimulus features shifts spectral tuning of V4 neurons during natural vision. *Neuron* 59:509–521.

de Haas B, Schwarzkopf DS, Anderson EJ, Rees G (2014) Perceptual load affects spatial tuning of neuronal populations in human early visual cortex. *Curr Biol* 24:R66–7.

Dumoulin SO, Knapen T (2018) How visual cortical organization is altered by ophthalmologic and neurologic disorders. *Annu Rev Vis Sci*. In press.

Dumoulin SO, Wandell BA (2008) Population receptive field estimates in human visual cortex. *NeuroImage* 39:647–660.

Egner T, Monti JMP, Trittschuh EH, Wieneke CA, Hirsch J, Mesulam MM (2008) Neural integration of top-down spatial and feature-based information in visual search. *J Neurosci* 28:6141–6151.

Found A, Müller HJ (1996) Searching for unknown feature targets on more than one dimension: Investigating a dimension-weighting account. *Percept Psychophys* 58:88–101.

Gregoriou GG, Gotts SJ, Zhou H, Desimone R (2009) High-frequency, long-range coupling between prefrontal and visual cortex during attention. *Science* 324:1207–1210.

Handy TC, Green V, Klein RM, Mangun GR (2001) Combined expectancies: event-related potentials reveal the early benefits of spatial attention that are obscured by reaction

time measures. *J Exp Psychol Human* 27:303–317.

Harvey BM, Dumoulin SO (2016) Visual motion transforms visual space representations similarly throughout the human visual hierarchy. *NeuroImage* 127:173–185.

Hayden BY, Gallant JL (2005) Time course of attention reveals different mechanisms for spatial and feature-based attention in area V4. *Neuron* 47:637–643.

Hayden BY, Gallant JL (2009) Combined effects of spatial and feature-based attention on responses of V4 neurons. *Vision Res* 49:1182–1187.

Hillyard SA, Munte TF (1984) Selective attention to color and location - an analysis with event-related brain potentials. *Percept Psychophys* 36:185–198.

Hopf J-M, Boelmans K, Schoenfeld MA, Luck SJ, Heinze H-J (2004) Attention to features precedes attention to locations in visual search: evidence from electromagnetic brain responses in humans. *J Neurosci* 24:1822–1832.

Hummer A, Ritter M, Tik M, Ledolter AA, Woletz M, Holder GE, Dumoulin SO, Schmidt-Erfurth U, Windischberger C (2016) Eyetracker-based gaze correction for robust mapping of population receptive fields. *NeuroImage* 142:211–224.

Ibos G, Freedman DJ (2016) Interaction between spatial and feature attention in posterior parietal cortex. *Neuron* 91:931–943.

Jehee JFM, Brady DK, Tong F (2011) Attention improves encoding of task-relevant features in the human visual cortex. *J Neurosci* 31:8210–8219.

Jenkinson M, Beckmann CF, Behrens TEJ, Woolrich MW, Smith SM (2012) FSL. *NeuroImage* 62:782–790.

Jerde TA, Merriam EP, Riggall AC, Hedges JH, Curtis CE (2012) Prioritized maps of space in human frontoparietal cortex. *J Neurosci* 32:17382–17390.

Kastner S, Pinsk MA (2004) Visual attention as a multilevel selection process. *Cogn Affect Behav Neurosci* 4:483–500.

Katzner S, Busse L, Treue S (2009) Attention to the color of a moving stimulus modulates motion-signal processing in macaque area MT: Evidence for a unified attentional system. *Front Sys Neurosci* 3:12.

Kay KN, Weiner KS, Grill-Spector K (2015) Attention reduces spatial uncertainty in human ventral temporal cortex. *Curr Biol* 25:595–600.

Kay KN, Yeatman JD (2017) Bottom-up and top-down computations in word- and

819 face-selective cortex. *eLife* 6:284.

820 Kingstone A (1992) Combining expectancies. *Q J Exp Psychol A* 44:69–104.

821 Klein BP, Harvey BM, Dumoulin SO (2014) Attraction of position preference by spa-  
822 tial attention throughout human visual cortex. *Neuron* 84:227–237.

823 Knapen T, de Gee JW, Brascamp J, Nuiten S, Hoppenbrouwers S, Theeuwes J (2016)  
824 Cognitive and ocular factors jointly determine pupil responses under equiluminance.  
825 *PLoS ONE* 11:e0155574.

826 Korn CW, Bach DR (2016) A solid frame for the window on cognition: Modeling  
827 event-related pupil responses. *J Vis* 16:28.

828 Kravitz DJ, Behrmann M (2011) Space-, object-, and feature-based attention interact  
829 to organize visual scenes. *Atten Percept Psychophys* 73:2434–2447.

830 Kumada T (2001) Feature-based control of attention: Evidence for two forms of di-  
831 mension weighting. *Percept Psychophys* 63:698–708.

832 Lee S, Papanikolaou A, Logothetis NK, Smirnakis SM, Keliris GA (2013) A new  
833 method for estimating population receptive field topography in visual cortex. *NeuroIm-  
834 age* 81:144–157.

835 Leonard CJ, Balestreri A, Luck SJ (2015) Interactions between space-based and  
836 feature-based attention. *J Exp Psychol Human* 41:11–16.

837 Levin N, Dumoulin SO, Winawer J, Dougherty RF, Wandell BA (2010) Cortical maps  
838 and white matter tracts following long period of visual deprivation and retinal image  
839 restoration. *Neuron* 65:21–31.

840 Liu J, Wandell BA (2005) Specializations for chromatic and temporal signals in human  
841 visual cortex. *J Neurosci* 25:3459–3468.

842 Love J, Selker R, Marsman M, Jamil T, Dropmann D (2015) Jasp (version 0.7)[com-  
843 puter software]. Amsterdam, The Netherlands: JASP Project.

844 Luck SJ, Chelazzi L, Hillyard SA, Desimone R (1997) Neural mechanisms of spatial  
845 selective attention in areas V1, V2, and V4 of macaque visual cortex. *J Neurophysiol*  
846 77:24–42.

847 Mackey WE, Winawer J, Curtis CE (2017) Visual field map clusters in human fron-  
848 toparietal cortex. *eLife* 6:e22974.

849 Maunsell JHR, Treue S (2006) Feature-based attention in visual cortex. *Trends Neu-*

850 rosci 29:317–322.

851 McAdams CJ, Maunsell J (2000) Attention to both space and feature modulates neu-  
852 ronal responses in macaque area V4. *J Neurophysiol* 83:1751–1755.

853 Miconi T, VanRullen R (2016) A feedback model of attention explains the diverse  
854 effects of attention on neural firing rates and receptive field structure. *PLoS Comput Biol*  
855 12:e1004770.

856 Moore T, Armstrong KM (2003) Selective gating of visual signals by microstimulation  
857 of frontal cortex. *Nature* 421:370–373.

858 Motter BC (1994) Neural correlates of attentive selection for color or luminance in  
859 extrastriate area V4. *J Neurosci* 14:2178–2189.

860 Müller MM, Andersen S, Trujillo NJ, Valdés-Sosa P, Malinowski P, Hillyard SA (2006)  
861 Feature-selective attention enhances color signals in early visual areas of the human brain.  
862 *Proc Natl Acad Sci USA* 103:14250–14254.

863 Nordfang M, Staugaard C, Bundesen C (2017) Attentional weights in vision as prod-  
864 ucts of spatial and nonspatial components. *Psychon Bull Rev* 23:238–239.

865 O’Craven KM, Downing PE, Kanwisher N (1999) fMRI evidence for objects as the  
866 units of attentional selection. *Nature* 401:584–587.

867 Patzwahl DR, Treue S (2009) Combining spatial and feature-based attention within  
868 the receptive field of MT neurons. *Vision Res* 49:1188–1193.

869 Pedregosa F, Eickenberg M, Ciuciu P, Thirion B, Gramfort A (2015) Data-driven HRF  
870 estimation for encoding and decoding models. *NeuroImage* 104:209–220.

871 Peirce JW (2008) Generating stimuli for neuroscience using PsychoPy. *Front Neu-*  
872 *roinform* 2:10.

873 Pestilli F, Carrasco M (2005) Attention enhances contrast sensitivity at cued and im-  
874 pairs it at uncued locations. *Vision Res* 45:1867–1875.

875 Poldrack RA (2017) Precision neuroscience: Dense sampling of individual brains.  
876 *Neuron* 95:727–729.

877 Posner MI, Snyder CR, Davidson BJ (1980) Attention and the detection of signals. *J*  
878 *Exp Psychol* 109:160–174.

879 Powell MJD (1964) An efficient method for finding the minimum of a function of

several variables without calculating derivatives. *Comput J* 7:155–162.

Puckett AM, DeYoe EA (2015) The attentional field revealed by single-voxel modeling of fMRI time courses. *J Neurosci* 35:5030–5042.

Reynolds JH, Heeger DJ (2009) The normalization model of attention. *Neuron* 61:168–185.

Reynolds JH, Pasternak T, Desimone R (2000) Attention increases sensitivity of V4 neurons. *Neuron* 26:703–714.

Rizzolatti G, Riggio L, Dascola I, Umiltà C (1987) Reorienting attention across the horizontal and vertical meridians: evidence in favor of a premotor theory of attention. *Neuropsychologia* 25:31–40.

Roberts M, Delicato LS, Herrero J, Giesemann MA, Thiele A (2007) Attention alters spatial integration in macaque V1 in an eccentricity-dependent manner. *Nat Neurosci* 10:1483–1491.

Rosenholtz R (2016) Capabilities and limitations of peripheral vision. *Annu Rev Vis Sci* 2:437–457.

Rossi AF, Paradiso MA (1995) Feature-specific effects of selective visual-attention. *Vision Res* 35:621–634.

Saenz M, Buračas GT, Boynton GM (2002) Global effects of feature-based attention in human visual cortex. *Nat Neurosci* 5:631–632.

Saenz M, Buračas GT, Boynton GM (2003) Global feature-based attention for motion and color. *Vision Res* 43:629–637.

Savitzky A, Golay MJE (1964) Smoothing and differentiation of data by simplified least squares procedures. *Anal Chem* 36:1627–1639.

Schneider KA, Richter MC, Kastner S (2004) Retinotopic organization and functional subdivisions of the human lateral geniculate nucleus: a high-resolution functional magnetic resonance imaging study. *J Neurosci* 24:8975–8985.

Schoenfeld MA, Hopf J-M, Martinez A, Mai HM, Sattler C, Gasde A, Heinze H-J, Hillyard SA (2007) Spatio-temporal analysis of feature-based attention. *Cereb Cortex* 17:2468–2477.

Schoenfeld MA, Hopf J-M, Merkel C, Heinze H-J, Hillyard SA (2014) Object-based attention involves the sequential activation of feature-specific cortical modules. *Nat Neu-*

roschi 17:619–624.

Serences JT, Boynton GM (2007) Feature-based attentional modulations in the absence of direct visual stimulation. *Neuron* 55:301–312.

Sheremata SL, Silver MA (2015) Hemisphere-dependent attentional modulation of human parietal visual field representations. *J Neurosci* 35:508–517.

Shulman GL (2002) Two attentional processes in the parietal lobe. *Cereb Cortex* 12:1124–1131.

Silva ME, Brascamp JW, Ferreira S, Castelo-Branco M, Dumoulin SO, Harvey BM (2017) Radial asymmetries in population receptive field size and cortical magnification factor in early visual cortex. *NeuroImage* 167:41–52.

Silver MA, Ress D, Heeger DJ (2005) Topographic maps of visual spatial attention in human parietal cortex. *J Neurophysiol* 94:1358–1371.

Snyder LH, Grieve KL, Brotchie P, Andersen RA (1998) Separate body- and world-referenced representations of visual space in parietal cortex. *Nature* 394:887–891.

Sprague TC, Serences JT (2013) Attention modulates spatial priority maps in the human occipital, parietal and frontal cortices. *Nat Neurosci* 16:1879–1887.

Swisher JD, Halko MA, Merabet LB, McMains SA, Somers DC (2007) Visual topography of human intraparietal sulcus. *J Neurosci* 27:5326–5337.

Szczepanski SM, Pinsk MA, Douglas MM, Kastner S, Saalmann YB (2013) Functional and structural architecture of the human dorsal frontoparietal attention network. *Proc Natl Acad Sci USA* 110:15806–15811.

Theeuwes J, van der Burg E (2007) The role of spatial and nonspatial information in visual selection. *J Exp Psychol Human* 33:1335–1351.

Tootell RB, Hadjikhani N, Hall EK, Marrett S, Vanduffel W, Vaughan JT, Dale AM (1998) The retinotopy of visual spatial attention. *Neuron* 21:1409–1422.

Treue S, Maunsell JH (1996) Attentional modulation of visual motion processing in cortical areas MT and MST. *Nature* 382:539–541.

Treue S, Trujillo JCM (1999) Feature-based attention influences motion processing gain in macaque visual cortex. *Nature* 399:575–579.

Trotter Y, Celebrini S (1999) Gaze direction controls response gain in primary visual-



cortex neurons. *Nature* 398:239–242.

van Opstal AJ, Hepp K, Suzuki Y, Henn V (1995) Influence of eye position on activity in monkey superior colliculus. *J Neurophysiol* 74:1593–1610.

Vo VA, Sprague TC, Serences JT (2017) Spatial tuning shifts increase the discriminability and fidelity of population codes in visual cortex. *J Neurosci* 37:3386–3401.

Watson AB, Pelli DG (1983) Quest: A Bayesian adaptive psychometric method. *Percept Psychophys* 33:113–120.

Wegener D, Ehn F, Aurich MK, Galashan FO, Kreiter AK (2008) Feature-based attention and the suppression of non-relevant object features. *Vision Res* 48:2696–2707.

White AL, Carrasco M (2011) Feature-based attention involuntarily and simultaneously improves visual performance across locations. *J Vis* 11:15–15.

White AL, Rolfs M, Carrasco M (2015) Stimulus competition mediates the joint effects of spatial and feature-based attention. *J Vis* 15:7–7.

Wolfe JM, Butcher SJ, Lee C, Hyle M (2003) Changing your mind: On the contributions of top-down and bottom-up guidance in visual search for feature singletons. *J Exp Psychol Human* 29:483–502.

Wolfe JM, Horowitz TS (2004) What attributes guide the deployment of visual attention and how do they do it? *Nat Rev Neurosci* 5:nrn1411–501.

Womelsdorf T, Anton-Erxleben K, Pieper F, Treue S (2006) Dynamic shifts of visual receptive fields in cortical area MT by spatial attention. *Nat Neurosci* 9:1156–1160.

Womelsdorf T, Anton-Erxleben K, Treue S (2008) Receptive field shift and shrinkage in macaque middle temporal area through attentional gain modulation. *J Neurosci* 28:8934–8944.

Yeshurun Y, Carrasco M (1998) Attention improves or impairs visual performance by enhancing spatial resolution. *Nature* 396:72–75.

Yeshurun Y, Carrasco M (1999) Spatial attention improves performance in spatial resolution tasks. *Vision Res* 39:293–306.

Yeshurun Y, Carrasco M (2000) The locus of attentional effects in texture segmentation. *Nat Neurosci* 3:622–627.

Yeshurun Y, Montagna B, Carrasco M (2008) On the flexibility of sustained attention

971 and its effects on a texture segmentation task. *Vision Res* 48:80–95.

972 Zanto TP, Rubens MT, Bollinger J, Gazzaley A (2010) Top-down modulation of visual  
973 feature processing: the role of the inferior frontal junction. *NeuroImage* 53:736–745.

974 Zhang W, Luck SJ (2009) Feature-based attention modulates feedforward visual pro-  
975 cessing. *Nat Neurosci* 12:24–25.

976 Zhou H, Desimone R (2011) Feature-based attention in the frontal eye field and area  
977 V4 during visual search. *Neuron* 70:1205–1217.

978 Zuiderbaan W, Harvey BM, Dumoulin SO (2012) Modeling center-surround config-  
979 urations in population receptive fields using fMRI. *J Vis* 12:10.

## Supplementary Material

### Introduction

This document contains figures and analyses performed for individual subjects. Results are reported using different methods. The ‘super subject’ method pools voxels across subjects and computes p-values and confidence intervals using bootstrapping across voxels. Resulting p-values were FDR corrected for multiple comparisons. This corresponds to what is reported in the main text. The ‘per subject’ method computes these same analyses, but for each subject individually. We report in how many of the subjects these bootstrap tests over voxels are significant with uncorrected  $p < .05$ . The ‘over subjects’ method takes the average over the ‘per subject’ results, and computes confidence intervals and t-tests over these 5 values. Statistical tables for all analyses are found at the bottom of this document.

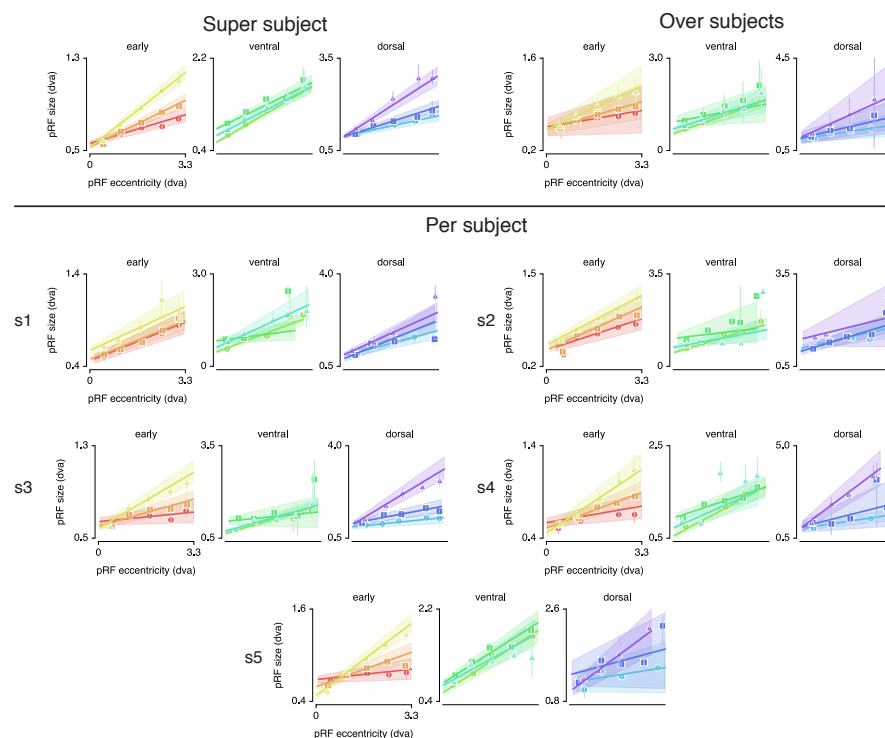

Figure 1: Eccentricity-size relations for all statistical methods.

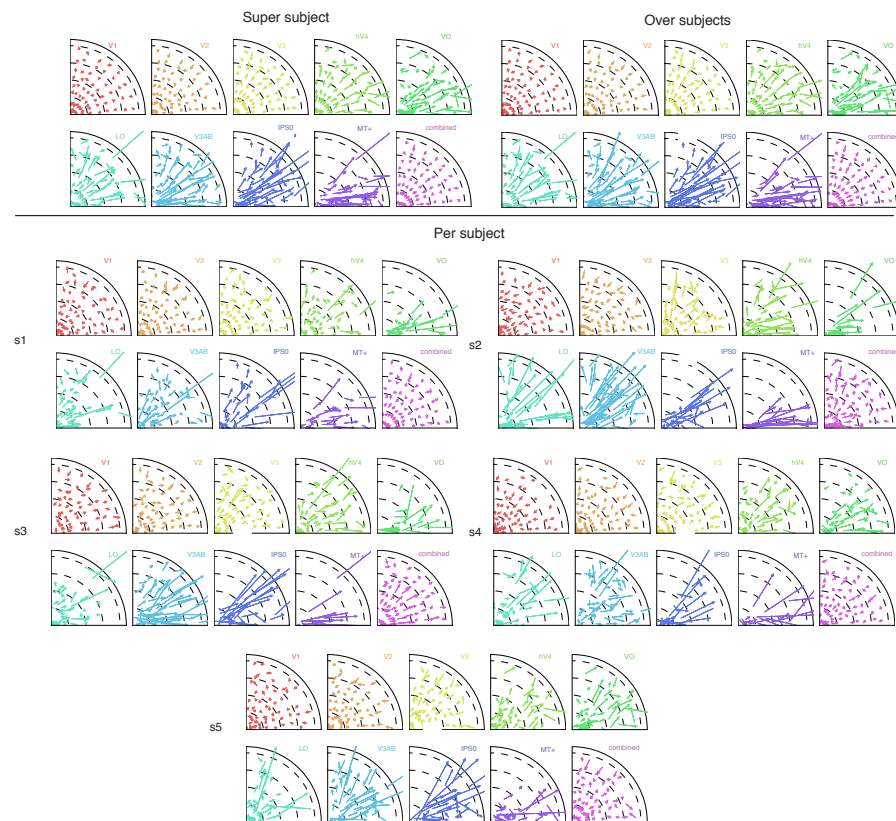

Figure 2: pRF shift plots for the different statistical methods. Shift vectors run from the *Attend Fixation* to the *Attend Stimulus* pRF location. This figure indicates that the shift patterns seen in the super subject are almost identical to the over subjects method, and highly agree with the individual subject figures. Note the radial shift direction that is readily apparent in all ROIs in all subjects. Also note how the *combined* ROI clearly shows paravoveal pRFs shifting toward the periphery and peripheral pRFs shifting toward the fovea across subjects. Finally, the absence of pRFs near the vertical meridian in data from all subjects in VO, IPS0 and MT+ highlight the overrepresentation of the horizontal meridian that is found in all ROIs (see Tables 2, 12 and 13).

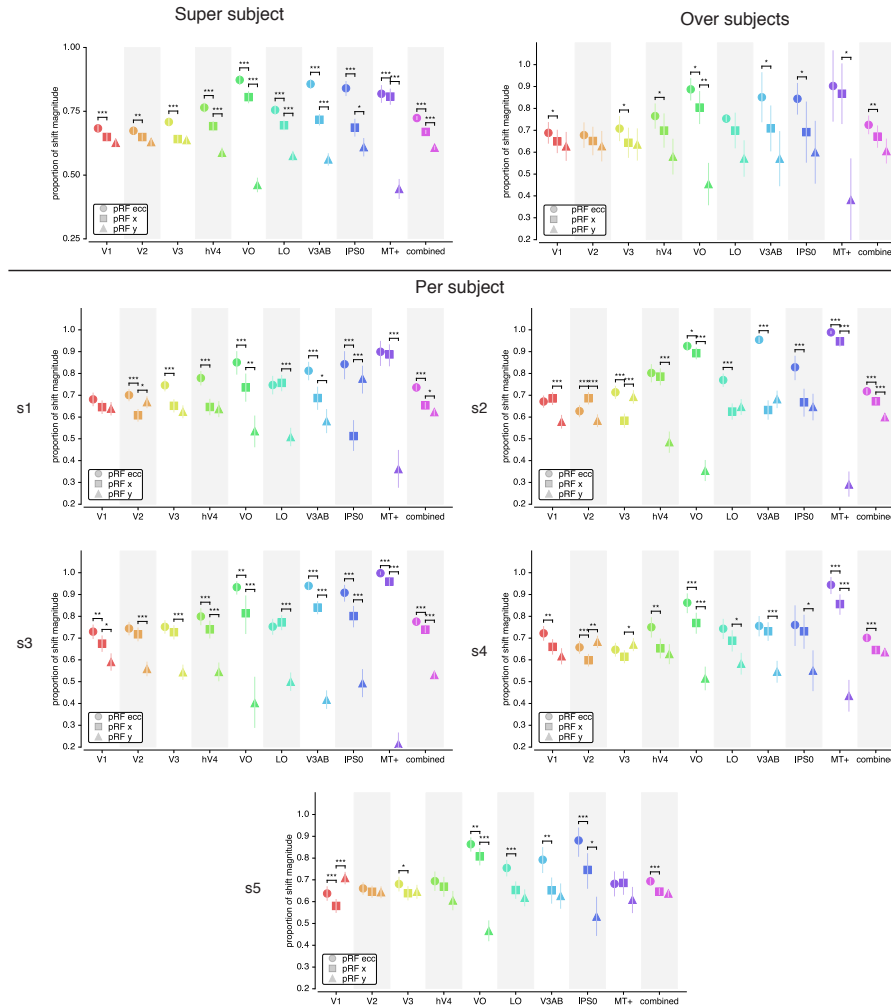

Figure 3: pRF shift directions for the different statistical methods. The 'over subject' panel replicates the 'super subject' results, namely that shifts are best explained by eccentricity changes, followed by changes in pRF x and finally in pRF y in all ROIs. The dominance of eccentricity over x changes was significant in all individual subjects ('per subject' method) in the *combined* ROI, and in at least 2 (but often 5) subjects in all other ROIs (see Table 10). The individual subject evidence also replicated the finding that pRFs shifted more in the x compared to y directions in hv4/VO/LO/V3AB/IPS0/MT+ and in the combined ROI (see Table 11). The dominance of x over y shifts was explained from a non-uniformity in the distribution of pRF polar angle (i.e. overrepresentation of horizontal meridian, see Table 2). This was also found in most individual subjects for most ROIs (see Tables 12 and 13). Single, double and tripple asterisks indicate significant differences at  $p < .05$ , .01 and .001 respectively.

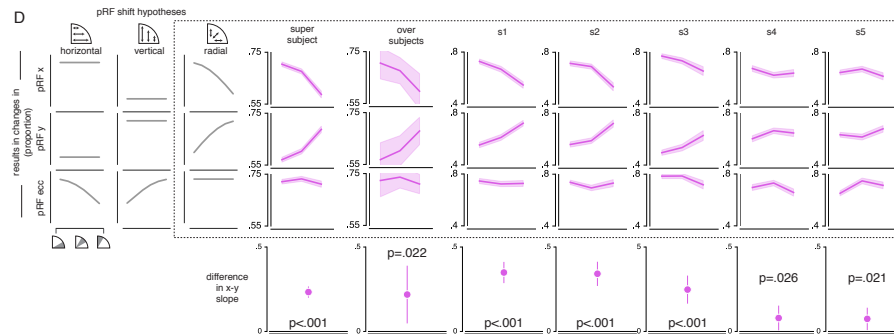

Figure 4: pRF x, y and eccentricity position shifts plotted as a function of polar angle, for different shift direction hypotheses. The data from all statistical methods closely matches the radial shift direction hypothesis, showing strongest pRF x shifts close to the horizontal meridian, strongest pRF y shifts close to the vertical meridian and no polar angle dependence of pRF eccentricity shifts. This is evidenced by a more positive slope of y change over polar angle compared to slope of x change over polar angle in the 'super subject' method (see main text for statistics), for the 'over subjects' method (slope difference = 0.219,  $t(4) = 3.616$ ,  $p = 0.022$ , Cohen's  $d = 1.808$ ), and was significant in every individual subject. Error bars reflect 95% CIs across voxels in the 'super subject' and 'per subject' method, and across subjects in the 'over subjects' method.

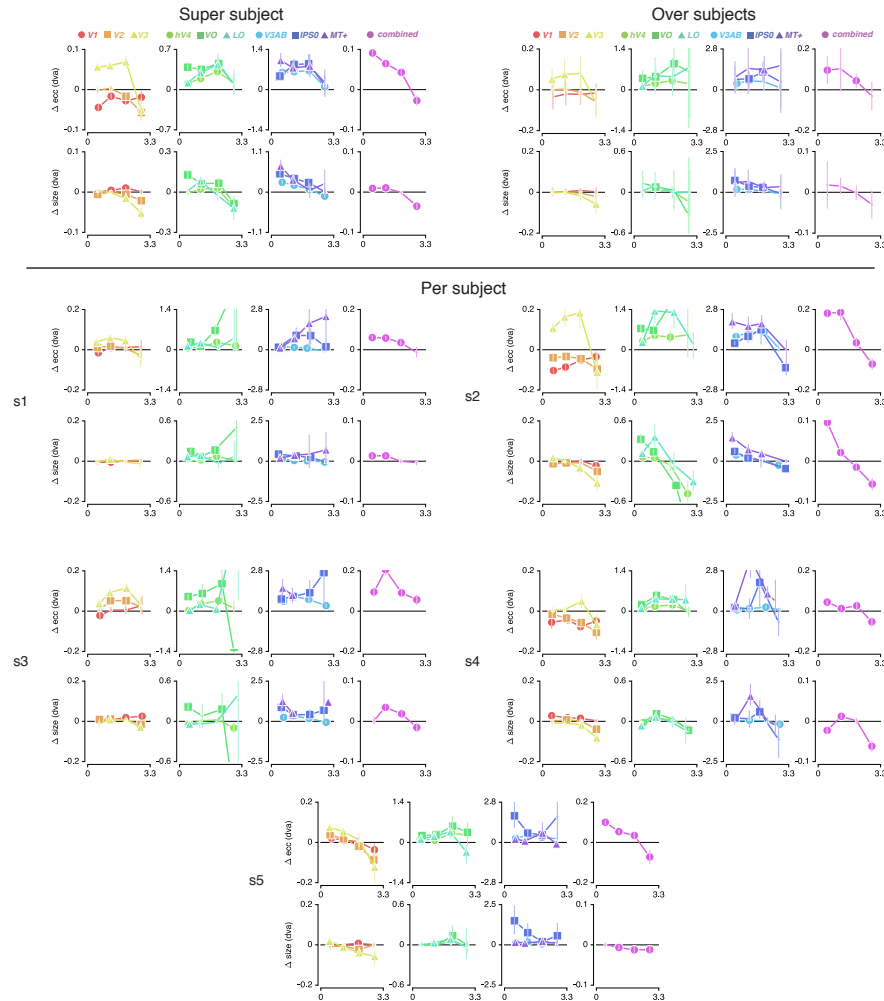

Figure 5: Difference between *Attention to Stimulus* and *Attention to Fixation* pRF eccentricity and size as a function of *Attention to Fixation* eccentricity (see Tables 3-6 and 14-21). The data shows a transition from inwards to outwards shifts across the visual hierarchy in all subjects. Additionally, the progressions of change over eccentricity are similar within ROIs across subjects. Finally, data from the *combined* ROI in most subjects reveals that parafoveal pRFs tend to shift away from the fovea and increase in size, while peripheral pRFs tend to shift toward the fovea and decrease in sizes. In the 'super subject' and 'per subject' methods markers' errorbar denotes 95% CI of data over voxels; in the 'over subjects' method, errorbar denotes 95% CI over subjects. Increased marker size indicates significance with  $p < .05$  (FDR corrected for 'super subject').

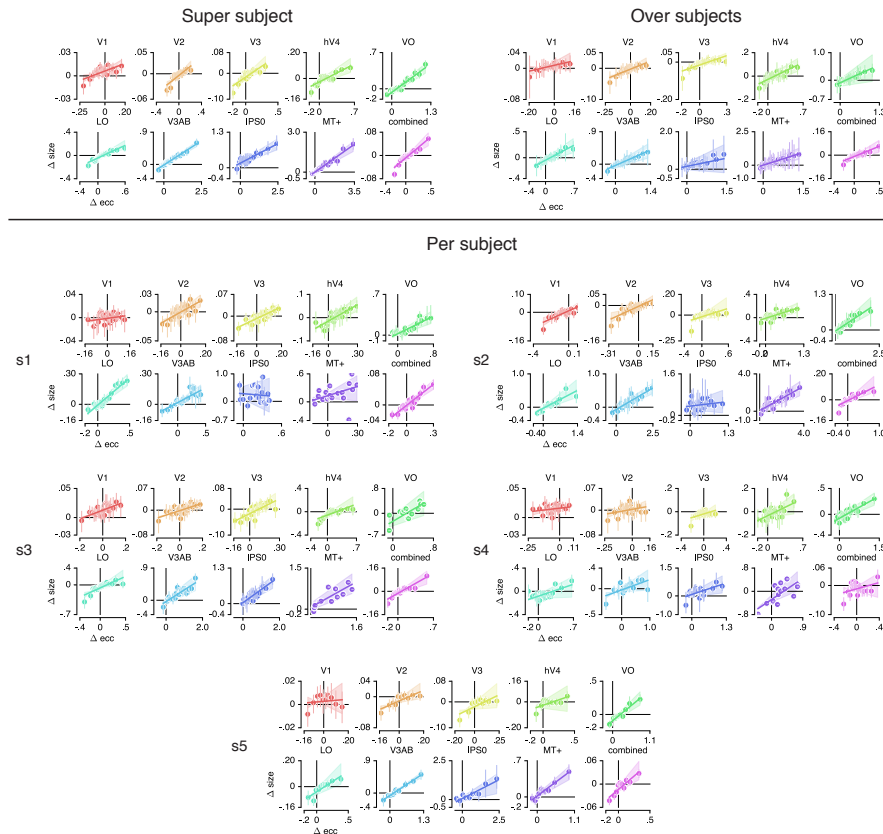

Figure 6: Changes in pRF eccentricity and size were strongly correlated in all ROIs. In the 'over subjects' method, we find that pRF eccentricity and size changes are significant in all ROIs except IPSO (although  $p = .070$ ). In the 'per subject method', we find such a significant correlation in at least 2 (but often 5) subjects (see Table 22). In the 'super subject' and for 'per subjects' figures, markers' errorbar denotes 95% CI of data over voxels; in the 'over subjects' figure, errorbar denotes 95% CI over subjects.



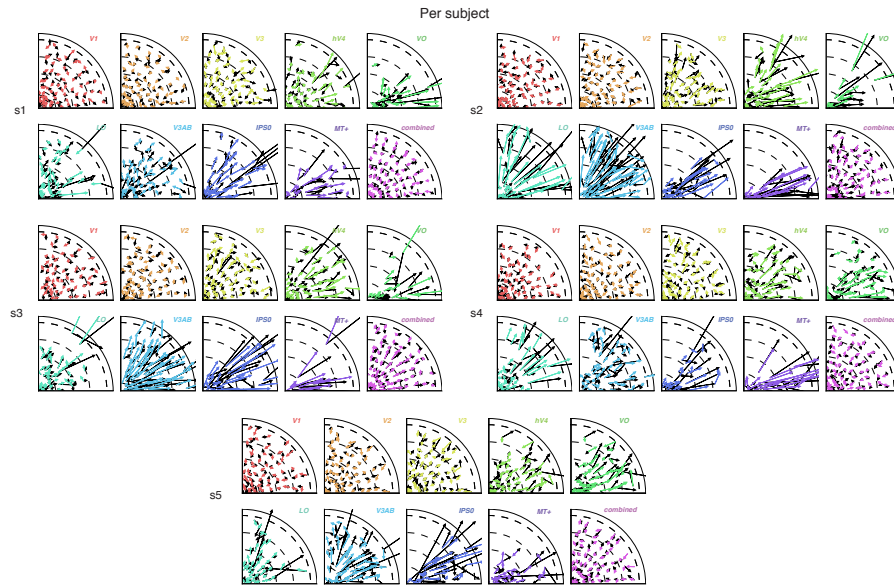

Figure 7: Attentional gain field modeling results for each subject. Arrows depict observed (black) and predicted (color) pRF shifts. This shows that the model closely captured the data in all individual subjects.

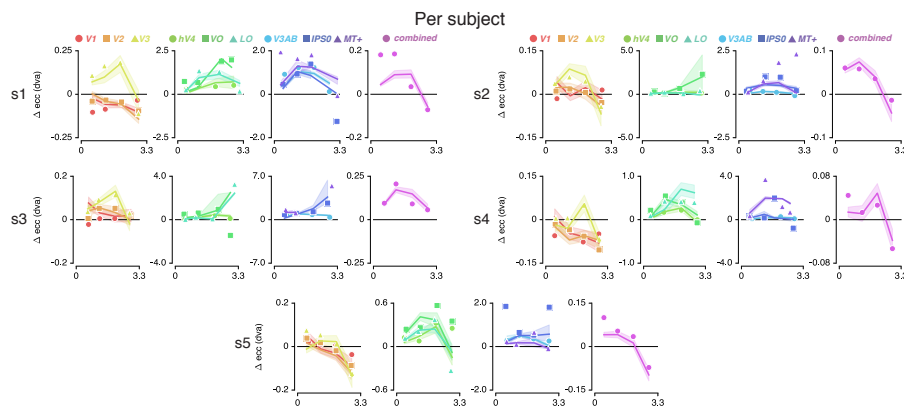

Figure 8: Attentional gain field modeling results for each subject. Observed (markers) and predicted (solid lines) pRF eccentricity difference between *Attend Fixation* and *Attend Stimulus* conditions for each subject. Shaded areas indicate 95% CI over voxels. This shows that the model was able to capture between subject variance with a high accuracy.

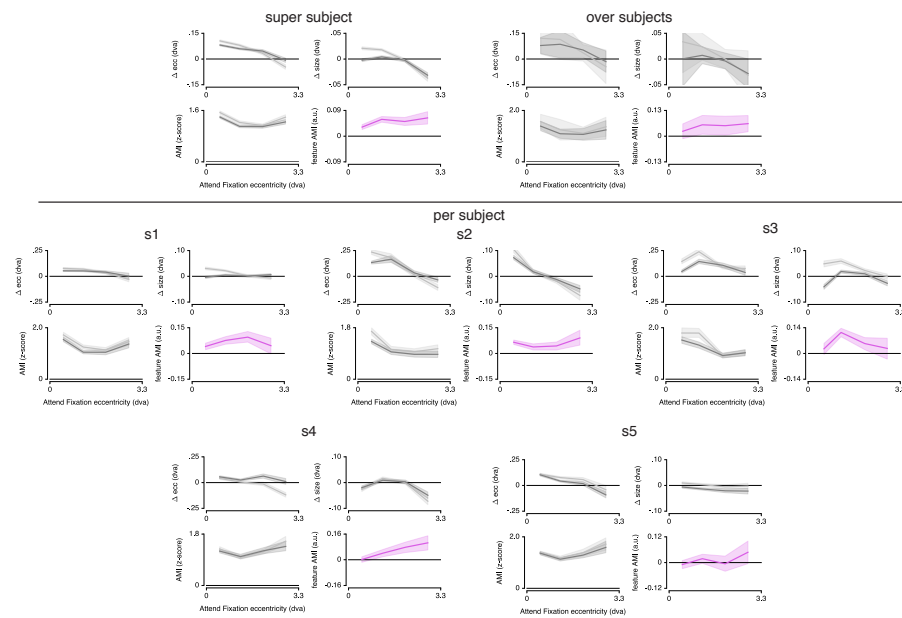

Figure 9: Differences in pRF eccentricity and size relative to the *Attention to Fixation* condition, for both the *Attention to Color* and *Attention to TF* condition separately. The changes in both eccentricity and size are more pronounced when attending changes in color versus TF in the bar. This pattern is most clear in the 'super subject' and 'over subjects' method (albeit with larger variance), and is present in most individual subjects. In the 'super subject' and 'per subject' figures, error bars denote 95% CI over voxels, in the 'over subject' method error bars indicate 95% CI over subjects.

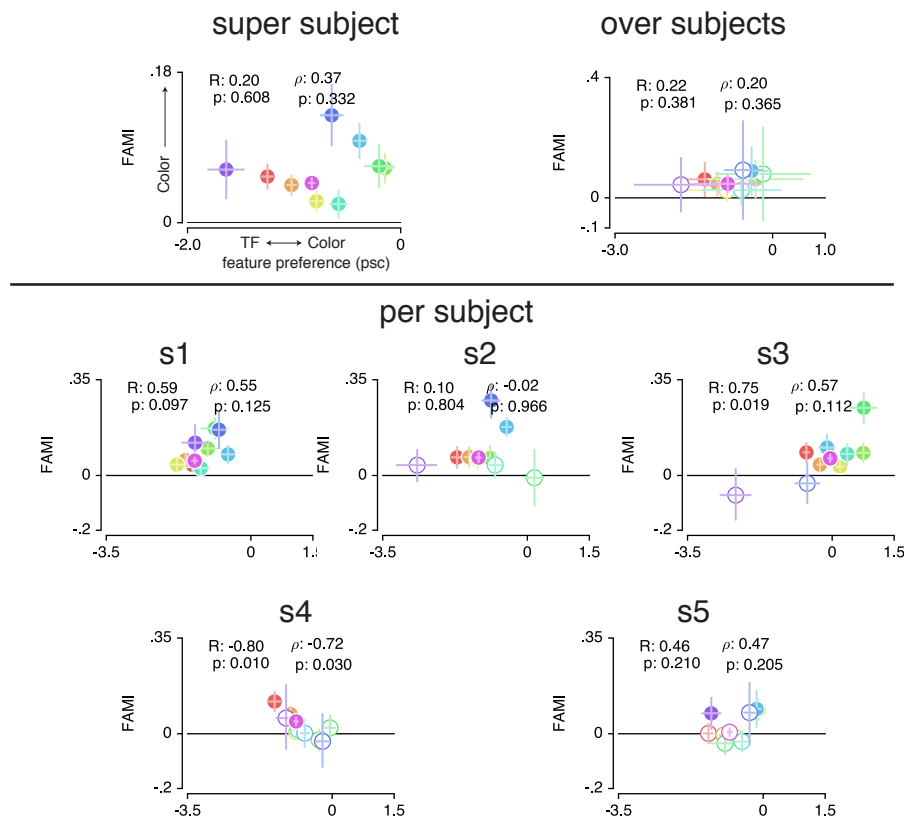

Figure 10: Feature AMI compared to feature preference for each ROI, for each statistical method. The y-axis displays feature AMI, which increases when pRF modulations (size and eccentricity changes combined, see Methods) are greater when attending color compared to TF. The x-axis displays feature preference, which increases with higher color compared to TF preference. pRF modulations were greater when attending color in all ROIs in the ‘super subject’ method, and was unrelated to feature preference (see Table 8). In the ‘over subjects’ method, we confirm that feature AMI was not different between ROIs over subjects (RM ANOVA, factor of ROI:  $F(8,4) = 1.108$ ,  $p = 0.384$ ,  $\eta^2 p = 0.225$ ), and that it was on average 0.064 over ROIs across subjects,  $t(4) = 4.654$ ,  $p = 0.010$ , cohen’s  $d = 2.081$ ). Additionally, we found that feature AMI was significantly positive in at least 2 (but often 4) out of 5 subjects in each ROI (see Table 23). Finally, we also found no correlation with feature preference in the ‘over subjects’ method ( $t(4) = 0.655$ ,  $p = .549$ , cohen’s  $d = 0.33$ ).

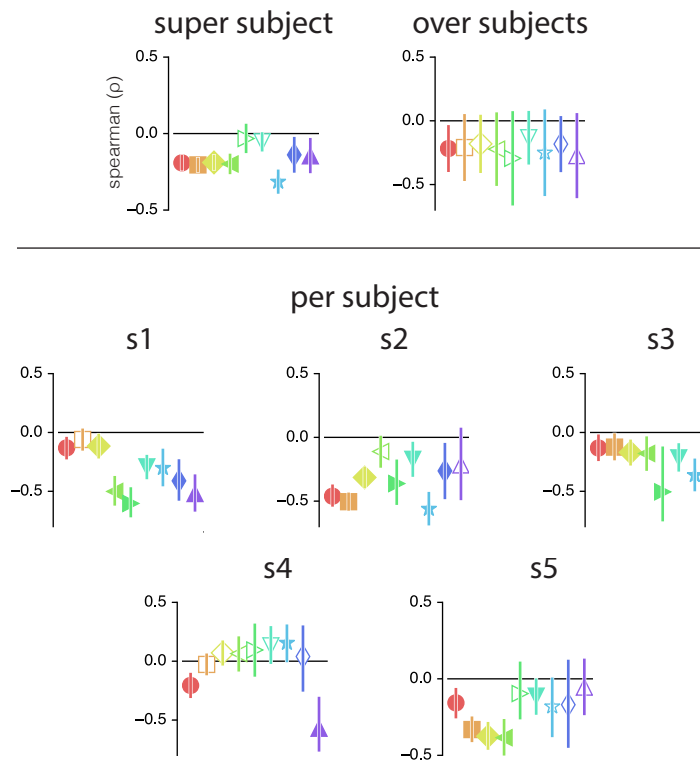

Figure 11: Color compared to TF preference versus eccentricity correlations. The ‘super subject’ method shows negative correlations in all ROIs except VO and LO. The ‘over’ subjects method shows that this correlation is negative on average and does not vary across ROI (RM ANOVA with main factor of ROI  $F(8,4) = 0.354$ ,  $p = .937$ ,  $\eta^2 p = .030$ , on average  $-0.218$  over ROIs,  $F(1,4) = 15.630$ ,  $p = .017$ ,  $\eta^2 p = .641$ ). When looking at individual subjects, we find that correlations are positive in at least two but often in the majority of subjects across ROIs (see Table 24).

## Statistical Tables - Main Text

Table 1: Statistics corresponding to Figure 2C on pRF shift direction ratios. P-values reflect proportion of bootstrapped differences that are different from 0. Single, double and triple asterisks indicate FDR corrected significance of <.05, <.01 and <.001 respectively. FDR correction performed over all p-values in this table simultaneously.

| ROI      | x>y   |          |                |           | ecc>x |          |                |           |
|----------|-------|----------|----------------|-----------|-------|----------|----------------|-----------|
|          | N     | p        | $\Delta$ ratio | cohen's d | N     | p        | $\Delta$ ratio | cohen's d |
| V1       | 2176  | .098     | .02            | .04       | 2176  | <.001*** | .03            | .09       |
| V2       | 2752  | .102     | .02            | .03       | 2752  | .002**   | .02            | .06       |
| V3       | 2320  | .773     | .00            | .01       | 2318  | <.001*** | .07            | .18       |
| hV4      | 1201  | <.001*** | .10            | .18       | 1201  | <.001*** | .07            | .20       |
| VO       | 582   | <.001*** | .34            | .67       | 573   | <.001*** | .08            | .37       |
| LO       | 1397  | <.001*** | .12            | .20       | 1394  | <.001*** | .06            | .16       |
| V3AB     | 880   | <.001*** | .16            | .27       | 873   | <.001*** | .15            | .46       |
| IPS0     | 313   | .023*    | .08            | .14       | 313   | <.001*** | .16            | .61       |
| MT+      | 325   | <.001*** | .36            | .68       | 306   | <.001*** | .04            | .28       |
| combined | 11946 | <.001*** | .06            | .10       | 11940 | <.001*** | .05            | .15       |

Table 2: Statistics corresponding to Figure 2 on uniformity of polar angle distributions. P-values test whether pRFs are distributed non-uniformly over polar angle (Rayleigh test). Triple asterisks indicate FDR corrected significance of <.001. FDR correction performed over all p-values in this table simultaneously.

| ROI  | N    | z       | p        |
|------|------|---------|----------|
| V1   | 2176 | 66.848  | <.001*** |
| V2   | 2754 | 51.904  | <.001*** |
| V3   | 2322 | 63.704  | <.001*** |
| hV4  | 1201 | 50.418  | <.001*** |
| VO   | 582  | 116.563 | <.001*** |
| LO   | 1405 | 40.995  | <.001*** |
| V3AB | 883  | 32.554  | <.001*** |

| ROI      | N     | z       | p        |
|----------|-------|---------|----------|
| IPS0     | 316   | 56.946  | <.001*** |
| MT+      | 328   | 119.052 | <.001*** |
| combined | 11967 | 463.382 | <.001*** |

Table 3: Statistics corresponding to Figure 3A on pRF eccentricity changes. P-values reflect whether bootstrapped distribution is different from 0, for each ROI and each eccentricity bin (bin 3 and 4 in table below). Single, double and triple asterisks indicate FDR corrected significance of <.05, <.01 and <.001 respectively. FDR correction performed over all p-values in this table simultaneously.

| ecc bin  | 1    |          |              |           | 2    |          |              |           |
|----------|------|----------|--------------|-----------|------|----------|--------------|-----------|
| ROI      | N    | p        | $\Delta$ ecc | cohen's d | N    | p        | $\Delta$ ecc | cohen's d |
| V1       | 509  | <.001*** | -.044        | -.44      | 749  | <.001*** | -.016        | -.20      |
| V2       | 862  | 0.504    | -.002        | -.02      | 931  | .204     | .004         | .04       |
| V3       | 920  | <.001*** | .056         | .49       | 747  | <.001*** | .059         | .58       |
| hV4      | 693  | <.001*** | .109         | .67       | 359  | <.001*** | .194         | .64       |
| VO       | 313  | <.001*** | .389         | 1.04      | 162  | <.001*** | .352         | .85       |
| LO       | 1047 | <.001*** | .121         | .62       | 263  | <.001*** | .295         | .60       |
| V3AB     | 220  | <.001*** | .600         | .86       | 348  | <.001*** | .623         | .87       |
| IPS0     | 170  | <.001*** | .473         | .91       | 86   | <.001*** | .876         | 1.05      |
| MT+      | 186  | <.001*** | 1.015        | .68       | 103  | <.001*** | .759         | .66       |
| combined | 4920 | <.001*** | .091         | .45       | 3748 | <.001*** | .065         | .37       |

Table 4: Statistics corresponding to Figure 3A on pRF eccentricity changes. P-values reflect whether bootstrapped distribution is different from 0, for each ROI and each eccentricity bin (bin 1 and 2 in table above). Single, double and triple asterisks indicate FDR corrected significance of <.05, <.01 and <.001 respectively. FDR correction performed over all p-values in this table simultaneously.

| ecc bin | 3 |   |              |           | 4 |   |              |           |
|---------|---|---|--------------|-----------|---|---|--------------|-----------|
| ROI     | N | p | $\Delta$ ecc | cohen's d | N | p | $\Delta$ ecc | cohen's d |

| ecc bin  | 3    |          |       |      | 4    |          |       |      |
|----------|------|----------|-------|------|------|----------|-------|------|
| V1       | 595  | <.001*** | -.028 | -.30 | 323  | .010*    | -.019 | -.15 |
| V2       | 616  | <.001*** | -.017 | -.16 | 343  | <.001*** | -.057 | -.36 |
| V3       | 427  | <.001*** | .069  | .43  | 226  | <.001*** | -.050 | -.24 |
| hV4      | 110  | <.001*** | .313  | .91  | 39   | 0.046    | .115  | .27  |
| VO       | 71   | <.001*** | .455  | 1.05 | 36   | .325     | .081  | .14  |
| LO       | 56   | <.001*** | .434  | .64  | 31   | .260     | .108  | .17  |
| V3AB     | 199  | <.001*** | .657  | .93  | 113  | .017*    | .102  | .21  |
| IPS0     | 36   | <.001*** | .896  | 1.01 | 21   | .470     | .135  | .17  |
| MT+      | 18   | <.001*** | .818  | 1.04 | 18   | .249     | .240  | .27  |
| combined | 2128 | <.001*** | .043  | .22  | 1150 | <.001*** | -.027 | -.14 |

Table 5: Statistics corresponding to Figure 3B on pRF size changes. P-values reflect whether bootstrapped pRF size difference distribution is different from 0, for each ROI and eccentricity bins 1 and 2 (bin 3 and 4 in table below). Single, double and triple asterisks indicate FDR corrected significance of <.05, <.01 and <.001 respectively. FDR correction performed over all p-values in this table simultaneously.

| ecc bin  | 1    |          |               |           | 2    |          |               |           |
|----------|------|----------|---------------|-----------|------|----------|---------------|-----------|
| ROI      | N    | p        | $\Delta$ size | cohen's d | N    | p        | $\Delta$ size | cohen's d |
| V1       | 509  | .624     | .001          | .02       | 749  | <.001*** | .004          | .15       |
| V2       | 862  | .007*    | -.006         | -.09      | 931  | .870     | .000          | .01       |
| V3       | 920  | .237     | .003          | .04       | 747  | .613     | -.001         | -.02      |
| hV4      | 693  | .040     | -.007         | -.08      | 359  | <.001*** | .021          | .24       |
| VO       | 313  | <.001*** | .128          | .51       | 162  | <.001*** | .063          | .34       |
| LO       | 1047 | .060     | .008          | .06       | 263  | <.001*** | .084          | .36       |
| V3AB     | 220  | <.001*** | .268          | .76       | 348  | <.001*** | .189          | .65       |
| IPS0     | 170  | <.001*** | .501          | .99       | 86   | <.001*** | .369          | .79       |
| MT+      | 186  | <.001*** | .711          | .68       | 103  | <.001*** | .332          | .77       |
| combined | 4920 | <.001*** | .009          | .10       | 3748 | <.001*** | .010          | .16       |

Table 6: Statistics corresponding to Figure 3B on pRF size changes. P-values reflect whether bootstrapped pRF size difference distribution is different from 0, for each ROI and eccentricity bins 3 and 4 (bin 1 and 2 in table above). Single, double and triple asterisks indicate FDR corrected significance of <.05, <.01 and <.001 respectively. FDR correction performed over all p-values in this table simultaneously.

| ecc bin  | 3    |          |               |           | 4    |          |               |           |
|----------|------|----------|---------------|-----------|------|----------|---------------|-----------|
| ROI      | N    | p        | $\Delta$ size | cohen's d | N    | p        | $\Delta$ size | cohen's d |
| V1       | 595  | <.001*** | .010          | .33       | 323  | .663     | .001          | .03       |
| V2       | 616  | .012*    | -.005         | -.10      | 343  | <.001*** | -.021         | -.31      |
| V3       | 427  | <.001*** | -.015         | -.19      | 226  | <.001*** | -.052         | -.54      |
| hV4      | 110  | .012*    | .029          | .24       | 39   | <.001*** | -.114         | -.72      |
| VO       | 71   | <.001*** | .066          | .41       | 36   | <.001*** | -.085         | -.98      |
| LO       | 56   | .108     | -.026         | -.21      | 31   | .006**   | -.119         | -.45      |
| V3AB     | 199  | <.001*** | .075          | .37       | 113  | <.001*** | -.111         | -.62      |
| IPS0     | 36   | <.001*** | .260          | .78       | 21   | .988     | .003          | .01       |
| MT+      | 18   | .541     | .056          | .14       | 18   | .128     | .227          | .31       |
| combined | 2128 | .252     | -.002         | -.03      | 1150 | <.001*** | -.035         | -.38      |

Table 7: Statistics corresponding to Figure 3C on correlations between eccentricity and size changes. P-values are two-tailed tests whether bootstrapped distribution of pRF eccentricity and size change correlations across bins is different from 0. Triple asterisks indicate FDR corrected significance of <.001. FDR correction performed over all p-values in this table simultaneously.

| ROI  | R    | N  | p        |
|------|------|----|----------|
| V1   | 0.74 | 20 | <.001*** |
| V2   | 0.86 | 20 | <.001*** |
| V3   | 0.87 | 20 | <.001*** |
| hV4  | 0.87 | 20 | <.001*** |
| VO   | 0.97 | 20 | <.001*** |
| LO   | 0.95 | 20 | <.001*** |
| V3AB | 0.99 | 20 | <.001*** |



| ROI      | R    | N  | p        |
|----------|------|----|----------|
| IPS0     | 0.93 | 20 | <.001*** |
| MT+      | 0.98 | 20 | <.001*** |
| combined | 0.94 | 20 | <.001*** |

Table 8: Statistics corresponding to Figure 5D on feature-based attentional modulation. P-values are uncorrected two-tailed tests whether bootstrapped feature attentional modulation index distribution is different from 0. Double and triple asterisks indicate FDR corrected significance of <.01 and <.001 respectively. FDR correction performed over all p-values in this table simultaneously.

| ROI  | N    | mean diff | p        | cohen_d |
|------|------|-----------|----------|---------|
| V1   | 1605 | 0.05      | <.001*** | 0.170   |
| V2   | 2165 | 0.04      | <.001*** | 0.146   |
| V3   | 1762 | 0.03      | <.001*** | 0.105   |
| hV4  | 860  | 0.05      | <.001*** | 0.197   |
| VO   | 451  | 0.08      | <.001*** | 0.290   |
| LO   | 1009 | 0.02      | 0.008**  | 0.085   |
| V3AB | 703  | 0.11      | <.001*** | 0.364   |
| IPS0 | 237  | 0.14      | <.001*** | 0.486   |
| MT+  | 252  | 0.08      | <.001*** | 0.270   |

Table 9: Statistics corresponding to Figure 6 on correlation between feature preference and eccentricity. P-values are uncorrected two-tailed tests whether bootstrapped correlation value of feature preference and pRF eccentricity differs from 0. Single and triple asterisks indicate FDR corrected significance of <.05 and <.001 respectively. FDR correction performed over all p-values in this table simultaneously.

| ROI | N    | corr   | p        |
|-----|------|--------|----------|
| V1  | 2154 | -0.191 | <.001*** |
| V2  | 2718 | -0.205 | <.001*** |
| V3  | 2274 | -0.189 | <.001*** |

| ROI  | N    | corr   | p        |
|------|------|--------|----------|
| hV4  | 1169 | -0.199 | <.001*** |
| VO   | 567  | -0.033 | 0.475    |
| LO   | 1365 | -0.054 | 0.052    |
| V3AB | 877  | -0.315 | <.001*** |
| IPS0 | 313  | -0.139 | 0.012*   |
| MT+  | 325  | -0.146 | 0.007*   |

2

### Statistical Tables - Supplementary Material

Table 10: Statistics corresponding to Supplementary Figure 3 on pRF x versus y shift ratios. P-values result from t-tests over the 5 subject values. Single, double and triple asterisks indicates uncorrected p-value < .05, .01 and .001 respectively. The last two columns reflect in how many out of 5 subjects these differences were different from 0 with uncorrected bootstrapped p-values of <.05 over voxels.

| ROI      | N | p      | t     | $\Delta$ ratio | cohen's d | x>y | y<x |
|----------|---|--------|-------|----------------|-----------|-----|-----|
| V1       | 5 | .614   | 0.546 | .02            | .27       | 2   | 1   |
| V2       | 5 | .638   | 0.508 | .02            | .25       | 2   | 2   |
| V3       | 5 | .882   | 0.158 | .01            | .08       | 1   | 2   |
| hV4      | 5 | .100   | 2.128 | .12            | 1.06      | 2   | 0   |
| VO       | 5 | .004** | 5.858 | .35            | 2.93      | 5   | 0   |
| LO       | 5 | .091   | 2.216 | .13            | 1.11      | 3   | 0   |
| V3AB     | 5 | .165   | 1.699 | .14            | .085      | 3   | 0   |
| IPS0     | 5 | .411   | 0.918 | .09            | .46       | 3   | 1   |
| MT+      | 5 | .014*  | 4.162 | .48            | 2.08      | 4   | 0   |
| combined | 5 | .151   | 1.773 | .07            | .89       | 3   | 0   |

Table 11: Statistics corresponding to Supplementary Figure 3 on pRF eccentricity versus x shift ratios. P-values result from t-tests over the 5 subject values. Single, double and triple asterisks indicates uncorrected p-value < .05, .01 and .001 respectively. The last two columns reflect in how many out of 5 subjects these differences were different from 0 with uncorrected bootstrapped p-values of <.05 over voxels.

| ROI      | N | p      | t     | $\Delta$ ratio | cohen's d | ecc>x | ecc<x |
|----------|---|--------|-------|----------------|-----------|-------|-------|
| V1       | 5 | .049*  | 2.797 | .04            | 1.40      | 3     | 0     |
| V2       | 5 | .350   | 1.057 | .03            | .53       | 2     | 1     |
| V3       | 5 | .036*  | 3.094 | .06            | 1.55      | 3     | 0     |
| hV4      | 5 | .037*  | 3.072 | .07            | 1.54      | 3     | 0     |
| VO       | 5 | .013*  | 4.240 | .08            | 2.12      | 5     | 0     |
| LO       | 5 | .153   | 1.764 | .06            | .88       | 2     | 0     |
| V3AB     | 5 | .037*  | 3.084 | .14            | 1.54      | 4     | 0     |
| IPS0     | 5 | .047*  | 2.845 | .15            | 1.42      | 4     | 0     |
| MT+      | 5 | .080   | 2.335 | .03            | 1.17      | 3     | 0     |
| combined | 5 | .003** | 6.707 | .05            | 3.35      | 5     | 0     |

Table 12: Rayleigh test for non-uniformity for subjects 1-3. Single, double and triple asterisks indicates uncorrected p-value < .05, .01 and .001 respectively.

|      | s1  |        |          | s2  |        |          | s3  |        |          |
|------|-----|--------|----------|-----|--------|----------|-----|--------|----------|
| ROI  | N   | z      | p        | N   | z      | p        | N   | z      | p        |
| V1   | 469 | 3.221  | .040*    | 558 | 26.131 | <.001*** | 333 | 11.823 | <.001*** |
| V2   | 592 | 0.659  | .518     | 605 | 9.986  | <.001*** | 411 | 48.090 | <.001*** |
| V3   | 533 | 1.021  | .360     | 463 | 22.909 | <.001*** | 389 | 12.275 | <.001*** |
| hV4  | 335 | 18.664 | <.001*** | 183 | 0.626  | .535     | 228 | 32.801 | <.001*** |
| VO   | 97  | 37.899 | <.001*** | 136 | 46.282 | <.001*** | 36  | 11.037 | <.001*** |
| LO   | 271 | 2.255  | .105     | 367 | 25.638 | <.001*** | 268 | 37.663 | <.001*** |
| V3AB | 169 | 4.560  | .010*    | 176 | 23.160 | <.001*** | 233 | 43.613 | <.001*** |
| IPS0 | 67  | 0.101  | .905     | 77  | 17.517 | <.001*** | 78  | 38.176 | <.001*** |
| MT+  | 43  | 14.066 | <.001*** | 71  | 17.095 | <.001*** | 43  | 27.463 | <.001*** |

|          | s1   |        |          | s2   |         |          | s3   |         |          |
|----------|------|--------|----------|------|---------|----------|------|---------|----------|
| combined | 2576 | 12.585 | <.001*** | 2636 | 119.207 | <.001*** | 2019 | 208.441 | <.001*** |

Table 13: Rayleigh test for non-uniformity for subjects 4-5. Single, double and triple asterisks indicates uncorrected p-value < .05, .01 and .001 respectively.

|          | s4   |        |          | s5   |         |          |
|----------|------|--------|----------|------|---------|----------|
| ROI      | N    | z      | p        | N    | z       | p        |
| V1       | 369  | 3.891  | .020*    | 447  | 40.575  | <.001*** |
| V2       | 563  | 4.195  | .015*    | 583  | 20.792  | <.001*** |
| V3       | 504  | 22.465 | <.001*** | 433  | 27.032  | <.001*** |
| hV4      | 218  | 0.995  | .370     | 237  | 30.059  | <.001*** |
| VO       | 146  | 24.882 | <.001*** | 167  | 28.314  | <.001*** |
| LO       | 195  | 4.618  | .010*    | 304  | 24.695  | <.001*** |
| V3AB     | 176  | 3.471  | .031*    | 129  | 18.098  | <.001*** |
| IPS0     | 49   | 12.339 | <.001*** | 45   | 11.335  | <.001*** |
| MT+      | 47   | 26.131 | <.001*** | 124  | 50.139  | <.001*** |
| combined | 2267 | 51.292 | <.001*** | 2469 | 163.225 | <.001*** |

Table 14: Statistics corresponding to Supplementary Figure 5 on pRF eccentricity changes in eccentricity bin 1. P-values reflect whether t-test showed that subject average values were different from 0, for each ROI. Single, double and triple asterisks indicate uncorrected significance of <.05, <.01 and <.001 respectively. Right most columns indicate in how many out of 5 subjects the bootstrap test over voxels was different from 0 with uncorrect p-value of < .05.

| ROI | N | p     | t      | $\Delta$ ecc | cohen's d | pos in | neg in |
|-----|---|-------|--------|--------------|-----------|--------|--------|
| V1  | 5 | .172  | -1.663 | -0.035       | -0.831    | 1      | 4      |
| V2  | 5 | .998  | 0.003  | 0.000        | 0.001     | 2      | 2      |
| V3  | 5 | .042* | 2.953  | 0.053        | 1.477     | 4      | 0      |
| hV4 | 5 | .052  | 2.729  | 0.124        | 1.365     | 5      | 0      |
| VO  | 5 | .017* | 3.903  | 0.393        | 1.952     | 5      | 0      |

| ROI      | N | p     | t     | $\Delta$ ecc | cohen's d | pos in | neg in |
|----------|---|-------|-------|--------------|-----------|--------|--------|
| LO       | 5 | .030* | 3.309 | 0.125        | 1.655     | 5      | 0      |
| V3AB     | 5 | .047* | 2.843 | 0.442        | 1.422     | 5      | 0      |
| IPS0     | 5 | .080  | 2.335 | 0.715        | 1.167     | 5      | 0      |
| MT+      | 5 | .089  | 2.237 | 0.858        | 1.119     | 5      | 0      |
| combined | 5 | .015* | 4.067 | 0.096        | 2.033     | 5      | 0      |

Table 15: Statistics corresponding to Supplementary Figure 5 on pRF eccentricity changes in eccentricity bin 2. P-values reflect whether t-test showed that subject average values were different from 0, for each ROI. Single, double and triple asterisks indicate uncorrected significance of <.05, <.01 and <.001 respectively. Right most columns indicate in how many out of 5 subjects the bootstrap test over voxels was different from 0 with uncorrect p-value of < .05.

| ROI      | N | p      | t      | $\Delta$ ecc | cohen's d | pos in | neg in |
|----------|---|--------|--------|--------------|-----------|--------|--------|
| V1       | 5 | .348   | -1.063 | -0.021       | -0.532    | 2      | 2      |
| V2       | 5 | .822   | 0.240  | 0.004        | 0.120     | 3      | 2      |
| V3       | 5 | .045*  | 2.884  | 0.075        | 1.442     | 4      | 0      |
| hV4      | 5 | .049*  | 2.805  | 0.216        | 1.402     | 5      | 0      |
| VO       | 5 | .014*  | 4.151  | 0.444        | 2.075     | 5      | 0      |
| LO       | 5 | .087   | 2.252  | 0.491        | 1.126     | 5      | 0      |
| V3AB     | 5 | .047*  | 2.837  | 0.623        | 1.419     | 5      | 0      |
| IPS0     | 5 | .009** | 4.674  | 0.753        | 2.337     | 4      | 0      |
| MT+      | 5 | .075   | 2.391  | 1.463        | 1.195     | 5      | 0      |
| combined | 5 | .056   | 2.671  | 0.103        | 1.335     | 5      | 0      |

Table 16: Statistics corresponding to Supplementary Figure 5 on pRF eccentricity changes in eccentricity bin 3. P-values reflect whether t-test showed that subject average values were different from 0, for each ROI. Single, double and triple asterisks indicate uncorrected significance of <.05, <.01 and <.001 respectively. Right most columns indicate in how many out of 5 subjects the bootstrap test over voxels was different from 0 with uncorrect p-value of < .05.

| ROI      | N | p      | t      | $\Delta$ ecc | cohen's d | pos in | neg in |
|----------|---|--------|--------|--------------|-----------|--------|--------|
| V1       | 5 | .296   | -1.202 | -0.022       | -0.601    | 0      | 2      |
| V2       | 5 | .556   | -0.642 | -0.012       | -0.321    | 1      | 3      |
| V3       | 5 | .057   | 2.651  | 0.081        | 1.326     | 4      | 0      |
| hV4      | 5 | .001** | 8.314  | 0.319        | 4.157     | 5      | 0      |
| VO       | 5 | .028*  | 3.355  | 0.897        | 1.678     | 5      | 0      |
| LO       | 5 | .120   | 1.969  | 0.444        | 0.985     | 4      | 0      |
| V3AB     | 5 | .053   | 2.714  | 0.557        | 1.357     | 5      | 0      |
| IPS0     | 5 | .007** | 5.103  | 1.234        | 2.551     | 5      | 0      |
| MT+      | 4 | .016*  | 4.896  | 1.378        | 2.827     | 4      | 0      |
| combined | 5 | .019*  | 3.799  | 0.044        | 1.900     | 5      | 0      |

Table 17: Statistics corresponding to Supplementary Figure 5 on pRF eccentricity changes in eccentricity bin 4. P-values reflect whether t-test showed that subject average values were different from 0, for each ROI. Single, double and triple asterisks indicate uncorrected significance of <.05, <.01 and <.001 respectively. Right most columns indicate in how many out of 5 subjects the bootstrap test over voxels was different from 0 with uncorrect p-value of < .05.

| ROI  | N | p    | t      | $\Delta$ ecc | cohen's d | pos in | neg in |
|------|---|------|--------|--------------|-----------|--------|--------|
| V1   | 5 | .369 | -1.011 | -0.016       | -0.506    | 0      | 3      |
| V2   | 5 | .071 | -2.442 | -0.059       | -1.221    | 0      | 3      |
| V3   | 5 | .085 | -2.273 | -0.063       | -1.136    | 0      | 3      |
| hV4  | 5 | .082 | 2.308  | 0.202        | 1.154     | 1      | 0      |
| VO   | 5 | .417 | 0.904  | 0.623        | 0.452     | 3      | 1      |
| LO   | 5 | .285 | 1.234  | 0.782        | 0.617     | 2      | 1      |
| V3AB | 5 | .122 | 1.960  | 0.154        | 0.980     | 1      | 0      |
| IPS0 | 5 | .516 | 0.711  | 0.533        | 0.356     | 2      | 1      |

| ROI      | N | p    | t      | $\Delta$ ecc | cohen's d | pos in | neg in |
|----------|---|------|--------|--------------|-----------|--------|--------|
| MT+      | 4 | .187 | 1.590  | 1.662        | 0.795     | 2      | 1      |
| combined | 5 | .273 | -1.270 | -0.031       | -0.635    | 1      | 3      |

Table 18: Statistics corresponding to Supplementary Figure 5 on pRF size changes in eccentricity bin 1. P-values reflect whether t-test showed that subject average values were different from 0, for each ROI. Single, double and triple asterisks indicate uncorrected significance of <.05, <.01 and <.001 respectively. Right most columns indicate in how many out of 5 subjects the bootstrap test over voxels was different from 0 with uncorrect p-value of < .05.

| ROI      | N | p     | t      | $\Delta$ ecc | cohen's d | pos dif | neg pos |
|----------|---|-------|--------|--------------|-----------|---------|---------|
| V1       | 5 | .768  | 0.315  | 0.002        | 0.158     | 1       | 1       |
| V2       | 5 | .511  | -0.721 | -0.003       | -0.361    | 1       | 1       |
| V3       | 5 | .777  | 0.304  | 0.002        | 0.152     | 2       | 0       |
| hV4      | 5 | .934  | -0.088 | -0.002       | -0.044    | 1       | 2       |
| VO       | 5 | .109  | 2.056  | 0.134        | 1.028     | 3       | 0       |
| LO       | 5 | .671  | 0.457  | 0.016        | 0.228     | 2       | 2       |
| V3AB     | 5 | .041* | 2.977  | 0.184        | 1.489     | 4       | 0       |
| IPS0     | 5 | .031* | 3.267  | 0.725        | 1.633     | 5       | 0       |
| MT+      | 5 | .124  | 1.943  | 0.603        | 0.971     | 4       | 0       |
| combined | 5 | .426  | 0.884  | 0.018        | 0.442     | 2       | 1       |

Table 19: Statistics corresponding to Supplementary Figure 5 on pRF size changes in eccentricity bin 2. P-values reflect whether t-test showed that subject average values were different from 0, for each ROI. Single, double and triple asterisks indicate uncorrected significance of <.05, <.01 and <.001 respectively. Right most columns indicate in how many out of 5 subjects the bootstrap test over voxels was different from 0 with uncorrect p-value of < .05.

| ROI | N | p    | t     | $\Delta$ ecc | cohen's d | pos dif | neg pos |
|-----|---|------|-------|--------------|-----------|---------|---------|
| V1  | 5 | .572 | 0.614 | 0.003        | 0.307     | 2       | 1       |
| V2  | 5 | .697 | 0.418 | 0.002        | 0.209     | 2       | 1       |
| V3  | 5 | .937 | 0.085 | 0.000        | 0.042     | 2       | 1       |

| ROI      | N | p     | t     | $\Delta$ ecc | cohen's d | pos dif | neg pos |
|----------|---|-------|-------|--------------|-----------|---------|---------|
| hV4      | 5 | .082  | 2.308 | 0.024        | 1.154     | 3       | 0       |
| VO       | 5 | .037* | 3.089 | 0.078        | 1.544     | 3       | 0       |
| LO       | 5 | .214  | 1.475 | 0.101        | 0.738     | 4       | 0       |
| V3AB     | 5 | .033* | 3.211 | 0.175        | 1.605     | 5       | 0       |
| IPS0     | 5 | .027* | 3.419 | 0.367        | 1.709     | 4       | 0       |
| MT+      | 5 | .058  | 2.631 | 0.656        | 1.316     | 5       | 0       |
| combined | 5 | .088  | 2.250 | 0.015        | 1.125     | 4       | 1       |

Table 20: Statistics corresponding to Supplementary Figure 5 on pRF size changes in eccentricity bin 3. P-values reflect whether t-test showed that subject average values were different from 0, for each ROI. Single, double and triple asterisks indicate uncorrected significance of <.05, <.01 and <.001 respectively. Right most columns indicate in how many out of 5 subjects the bootstrap test over voxels was different from 0 with uncorrect p-value of < .05.

| ROI      | N | p     | t      | $\Delta$ ecc | cohen's d | pos dif | neg pos |
|----------|---|-------|--------|--------------|-----------|---------|---------|
| V1       | 5 | .061  | 2.579  | 0.009        | 1.290     | 3       | 0       |
| V2       | 5 | .373  | -1.001 | -0.005       | -0.501    | 0       | 1       |
| V3       | 5 | .111  | -2.041 | -0.017       | -1.020    | 0       | 3       |
| hV4      | 5 | .376  | 0.995  | 0.022        | 0.498     | 1       | 0       |
| VO       | 5 | .773  | 0.308  | 0.031        | 0.154     | 3       | 1       |
| LO       | 5 | .800  | -0.271 | -0.007       | -0.135    | 1       | 0       |
| V3AB     | 5 | .085  | 2.280  | 0.068        | 1.140     | 3       | 0       |
| IPS0     | 5 | .034* | 3.164  | 0.297        | 1.582     | 4       | 0       |
| MT+      | 4 | .076  | 2.662  | 0.285        | 1.537     | 2       | 0       |
| combined | 5 | .800  | -0.270 | -0.002       | -0.135    | 1       | 2       |



Table 21: Statistics corresponding to Supplementary Figure 5 on pRF size changes in eccentricity bin 4. P-values reflect whether t-test showed that subject average values were different from 0, for each ROI. Single, double and triple asterisks indicate uncorrected significance of <.05, <.01 and <.001 respectively. Right most columns indicate in how many out of 5 subjects the bootstrap test over voxels was different from 0 with uncorrect p-value of < .05.

| ROI      | N | p     | t      | $\Delta$ ecc | cohen's d | pos dif | neg pos |
|----------|---|-------|--------|--------------|-----------|---------|---------|
| V1       | 5 | .800  | 0.270  | 0.002        | 0.135     | 1       | 1       |
| V2       | 5 | .122  | -1.959 | -0.021       | -0.979    | 0       | 3       |
| V3       | 5 | .028* | -3.386 | -0.058       | -1.693    | 0       | 4       |
| hV4      | 5 | .188  | -1.587 | -0.141       | -0.793    | 0       | 3       |
| VO       | 5 | .329  | -1.110 | -0.338       | -0.555    | 0       | 3       |
| LO       | 5 | .997  | -0.004 | 0.000        | -0.002    | 0       | 1       |
| V3AB     | 5 | .352  | -1.052 | -0.075       | -0.526    | 0       | 4       |
| IPSO     | 5 | .827  | -0.233 | -0.079       | -0.117    | 2       | 1       |
| MT+      | 5 | .257  | 1.322  | 0.349        | 0.661     | 2       | 0       |
| combined | 5 | .071  | -2.447 | -0.030       | -1.223    | 0       | 4       |

Table 22: Statistics corresponding to Supplementary Figure 6 on correlations between eccentricity and size changes. P-values are uncorrected two-tailed tests whether t-test of over subject pRF eccentricity and size change correlations is different from 0. Single and triple asterisks indicate uncorrected significance of <.01 and <.001 respectively. Right most columns indicate in how many out of 5 subjects the bootstrap test over voxels was different from 0 with uncorrect p-value of < .05.

| ROI  | R     | N | t      | p        | pos in | neg in |
|------|-------|---|--------|----------|--------|--------|
| V1   | 0.461 | 5 | 2.888  | .045*    | 2      | 0      |
| V2   | 0.704 | 5 | 6.411  | .003**   | 4      | 0      |
| V3   | 0.704 | 5 | 7.219  | .002**   | 5      | 0      |
| hV4  | 0.749 | 5 | 10.609 | <.001*** | 5      | 0      |
| VO   | 0.886 | 5 | 12.673 | <.001*** | 5      | 0      |
| LO   | 0.847 | 5 | 8.074  | .001**   | 5      | 0      |
| V3AB | 0.861 | 5 | 6.954  | .002**   | 5      | 0      |

| ROI      | R     | N | t     | p      | pos in | neg in |
|----------|-------|---|-------|--------|--------|--------|
| IPS0     | 0.500 | 5 | 2.450 | .070   | 3      | 0      |
| MT+      | 0.745 | 5 | 6.261 | .003** | 4      | 0      |
| combined | 0.799 | 5 | 5.431 | .006** | 4      | 0      |

Table 23: Statistics corresponding to Supplementary Figure 10. Astrisk indicate whether the average feature AMI over subjects was different from 0 with  $p < .05$ . Right most columns indicate in how many out of 5 subjects the bootstrap test over voxels was different from 0 with uncorrect p-value of  $< .05$ .

| ROI  | N | mean diff | t     | p     | cohen d | pos in | neg in |
|------|---|-----------|-------|-------|---------|--------|--------|
| V1   | 5 | 0.065     | 4.008 | .016* | 2.004   | 4      | 0      |
| V2   | 5 | 0.040     | 4.195 | .014* | 2.097   | 4      | 0      |
| V3   | 5 | 0.028     | 1.985 | .118  | 0.992   | 2      | 0      |
| hV4  | 5 | 0.055     | 3.235 | .032* | 1.618   | 4      | 0      |
| VO   | 5 | 0.079     | 1.594 | .186  | 0.797   | 2      | 0      |
| LO   | 5 | 0.026     | 1.122 | .325  | 0.561   | 2      | 1      |
| V3AB | 5 | 0.111     | 3.243 | .032* | 1.621   | 4      | 0      |
| IPS0 | 5 | 0.113     | 2.218 | .091  | 1.109   | 2      | 0      |
| MT+  | 5 | 0.060     | 1.531 | .201  | 0.766   | 3      | 0      |

Table 24: Statistics corresponding to Supplementary Figure 11. Astrisk indicate whether the spearman correlation between feature preference and eccentricity over subjects was different from 0 with  $p < .05$ . Right most columns indicate in how many out of 5 subjects the bootstrap test over voxels was different from 0 with uncorrect p-value of  $< .05$ .

| ROI | N | corr   | p     | pos in | neg in |
|-----|---|--------|-------|--------|--------|
| V1  | 5 | -0.218 | .031* | 0      | 5      |
| V2  | 5 | -0.210 | .090  | 0      | 3      |
| V3  | 5 | -0.181 | .084  | 0      | 4      |
| hV4 | 5 | -0.222 | .095  | 0      | 3      |
| VO  | 5 | -0.294 | .088  | 0      | 3      |

| ROI  | N | corr   | p    | pos in | neg in |
|------|---|--------|------|--------|--------|
| LO   | 5 | -0.133 | .138 | 0      | 4      |
| V3AB | 5 | -0.250 | .105 | 1      | 3      |
| IPS0 | 5 | -0.183 | .076 | 0      | 2      |
| MT+  | 5 | -0.273 | .085 | 0      | 2      |
